# Supplementary material for: (Ro)vibrational Spectroscopic Constants, Lifetime and QTAIM Evaluation of Fullerene Dimers Stability
Source: MDPI journal article supplement (doi:10.3390/molecules28135023), 2023-06-27
Supplement: s1 [file s1]

# **(Ro)vibrational spectroscopic constants, lifetime and QTAIM evaluation of fullerene dimers stability**

**Rodrigo A. Lemos Silva,<sup>1,3</sup> Mateus R. Barbosa,<sup>5</sup> Caio R. Martins<sup>3</sup>, Daniel F. Scalabrini Machado,<sup>4</sup>  
Luciano Ribeiro,<sup>3,\*</sup> Heibbe C. B. de Oliveira<sup>5,\*</sup> and Demétrio A. da Silva Filho<sup>2</sup>**

<sup>1</sup> Instituto Federal de Educação, Ciência e Tecnologia de Goiás (IFG), Câmpus Jataí, CP 75804-714, Jataí, GO, Brazil

<sup>2</sup> Grupo de Semicondutores Orgânicos, Instituto de Física, Campus Darcy Ribeiro, Universidade de Brasília, CP 4478, 70919-970, Brasília, DF, Brazil

<sup>3</sup> Grupo de Química Teórica e Estrutural de Anápolis (GQTEA), Campus Central Anápolis de Ciências Exatas e Tecnológicas Henrique Santillo, Universidade Estadual de Goiás, CP 459, Anápolis, GO, Brazil

<sup>4</sup> Laboratório de Modelagem Molecular de Sistemas Complexos (LMSC), Instituto de Química, Universidade de Brasília, CP 4478, 70919-970, Brasília, DF, Brazil

<sup>5</sup> Laboratório de Estrutura Eletrônica e Dinâmica Molecular (LEEDMOL), Instituto de Química, Universidade Federal de Goiás, CP 131, Goiânia, GO 74001-970, Brazil

\* lribeiro@ueg.br; \* heibbe@ufg.br

## **Supporting Information**

### **Contents**

|                |    |
|----------------|----|
| Table S1.....  | 2  |
| Table S2.....  | 2  |
| Table S3.....  | 3  |
| Table S4.....  | 3  |
| Table S5.....  | 4  |
| Table S6.....  | 5  |
| Table S7.....  | 13 |
| Table S8.....  | 19 |
| Figure S1..... | 5  |
| Figure S2..... | 6  |
| Figure S3..... | 7  |
| Figure S4..... | 8  |
| Figure S5..... | 9  |
| Figure S6..... | 10 |
| Figure S7..... | 13 |

**Table S1.** Parameters utilized for the potential fit through the Rydberg function for the  $(C_{20})_2$ ,  $(C_{24})_2$  e  $(C_{36})_2$  dimers.

| Parameters                | $(C_{20})_2$       | $(C_{24})_2$       | $(C_{36})_2$       |
|---------------------------|--------------------|--------------------|--------------------|
| $a_1(\text{\AA}^{-1})$    | 1.382296283748     | 1.655520259343     | 1.489512569107     |
| $a_2(\text{\AA}^{-2})$    | -0.613336853427    | -0.511033188834    | -0.640266331647    |
| $a_3(\text{\AA}^{-3})$    | 0.431444235886     | 0.211579334300     | 0.314330181242     |
| $a_4(\text{\AA}^{-4})$    | -0.081274263814    | 0.232102580314     | 0.095042385956     |
| $a_5(\text{\AA}^{-5})$    | 0.008407447218     | -0.096380917163    | -0.048715598849    |
| $a_6(\text{\AA}^{-6})$    | 0.000686843085     | 0.015090390276     | 0.007341205437     |
| $D_e(\text{kcal/mol})$    | 1.399500015242     | 2.905001534972     | 4.522900105120     |
| $R_0(\text{\AA})$         | 7.657192031840     | 7.690292985391     | 8.142999649003     |
| $\chi^2(\text{kcal/mol})$ | 3.289794795301E-05 | 4.693895980794E-05 | 9.559571764342E-05 |

**Table S2.** Parameters utilized for the potential fit through the Rydberg function for the  $(C_{60})_2$ ,  $(C_{70})_2$  e  $(C_{84})_2$  dimers.

| Parameters                | $(C_{60})_2$       | $(C_{70})_2$      | $(C_{84})_2$      |
|---------------------------|--------------------|-------------------|-------------------|
| $a_1(\text{\AA}^{-1})$    | 1.405307280248     | 1.351086576379    | 1.510531912516    |
| $a_2(\text{\AA}^{-2})$    | -0.745280808494    | -0.738948458009   | -0.590635149516   |
| $a_3(\text{\AA}^{-3})$    | 0.407860812683     | 0.400421160872    | 0.372092153230    |
| $a_4(\text{\AA}^{-4})$    | 0.004071309685     | 0.003805208695    | 0.067208088029    |
| $a_5(\text{\AA}^{-5})$    | -0.020584302212    | -0.020697907717   | -0.042140891776   |
| $a_6(\text{\AA}^{-6})$    | 0.003826456070     | 0.003541573910    | 0.007565856445    |
| $D_e(\text{kcal/mol})$    | 6.580230974750     | 7.667389935915    | 10.413984425274   |
| $R_0(\text{\AA})$         | 10.068927683590    | 10.201000211979   | 10.467438271011   |
| $\chi^2(\text{kcal/mol})$ | 8.546616880279E-05 | 2.36163185089E-04 | 1.584479030689E-4 |

**Table S3.** Quantized energies of the first ten vibrational levels (in  $\text{cm}^{-1}$ ) for the  $(\text{C}_{20})_2$ ,  $(\text{C}_{24})_2$ ,  $(\text{C}_{36})_2$ ,  $(\text{C}_{60})_2$ ,  $(\text{C}_{70})_2$  and  $(\text{C}_{84})_2$  dimers.

| $\nu$ | $(\text{C}_{20})_2$ | $(\text{C}_{24})_2$ | $(\text{C}_{36})_2$ | $(\text{C}_{60})_2$ | $(\text{C}_{70})_2$ | $(\text{C}_{84})_2$ |
|-------|---------------------|---------------------|---------------------|---------------------|---------------------|---------------------|
| 0     | 10.3                | 14.8                | 14.5                | 13.6                | 13.1                | 14.9                |
| 1     | 30.5                | 43.5                | 43.6                | 40.7                | 39.3                | 44.7                |
| 2     | 50.2                | 71.8                | 72.4                | 67.6                | 65.3                | 74.3                |
| 3     | 69.3                | 99.7                | 100.8               | 94.3                | 91.2                | 103.7               |
| 4     | 88.1                | 127.0               | 128.9               | 120.8               | 116.9               | 133.0               |
| 5     | 106.1               | 154.0               | 156.8               | 147.2               | 142.5               | 162.1               |
| 6     | 123.6               | 180.4               | 184.3               | 173.4               | 167.9               | 191.1               |
| 7     | 140.7               | 206.4               | 211.5               | 199.4               | 193.2               | 219.9               |
| 8     | 157.2               | 231.9               | 238.4               | 225.2               | 218.3               | 248.6               |
| 9     | 173.2               | 256.9               | 254.5               | 250.7               | 243.2               | 277.1               |

**Table S4.** Lifetime values for the  $(\text{C}_{20})_2$ ,  $(\text{C}_{24})_2$ ,  $(\text{C}_{36})_2$ ,  $(\text{C}_{60})_2$ ,  $(\text{C}_{70})_2$  and  $(\text{C}_{84})_2$  dimers from temperature of 200 K until 500 K.

| Temperature<br>(K) | Life time (s)       |                     |                     |                     |                     |                     |
|--------------------|---------------------|---------------------|---------------------|---------------------|---------------------|---------------------|
|                    | $(\text{C}_{20})_2$ | $(\text{C}_{24})_2$ | $(\text{C}_{36})_2$ | $(\text{C}_{60})_2$ | $(\text{C}_{70})_2$ | $(\text{C}_{84})_2$ |
| 200                | 5.047E-11           | 1.535E-09           | 8.960E-08           | 1.718E-05           | 2.721E-04           | 2.476E-01           |
| 210                | 4.283E-11           | 1.090E-09           | 5.237E-08           | 7.847E-06           | 1.090E-04           | 7.146E-02           |
| 220                | 3.689E-11           | 7.977E-10           | 3.214E-08           | 3.848E-06           | 4.750E-05           | 2.309E-02           |
| 230                | 3.219E-11           | 6.001E-10           | 2.058E-08           | 2.008E-06           | 2.224E-05           | 8.231E-03           |
| 240                | 2.841E-11           | 4.622E-10           | 1.368E-08           | 1.106E-06           | 1.109E-05           | 3.198E-03           |
| 250                | 2.533E-11           | 3.636E-10           | 9.394E-09           | 6.389E-07           | 5.849E-06           | 1.340E-03           |
| 260                | 2.278E-11           | 2.913E-10           | 6.640E-09           | 3.850E-07           | 3.240E-06           | 6.002E-04           |
| 270                | 2.065E-11           | 2.372E-10           | 4.816E-09           | 2.409E-07           | 1.875E-06           | 2.854E-04           |
| 280                | 1.885E-11           | 1.961E-10           | 3.574E-09           | 1.559E-07           | 1.128E-06           | 1.431E-04           |
| 290                | 1.731E-11           | 1.642E-10           | 2.707E-09           | 1.039E-07           | 7.032E-07           | 7.523E-05           |
| 300                | 1.599E-11           | 1.391E-10           | 2.089E-09           | 7.117E-08           | 4.523E-07           | 4.129E-05           |
| 310                | 1.485E-11           | 1.192E-10           | 1.639E-09           | 4.996E-08           | 2.993E-07           | 2.356E-05           |
| 320                | 1.385E-11           | 1.031E-10           | 1.306E-09           | 3.585E-08           | 2.032E-07           | 1.392E-05           |
| 330                | 1.298E-11           | 8.992E-11           | 1.055E-09           | 2.625E-08           | 1.413E-07           | 8.492E-06           |
| 340                | 1.220E-11           | 7.909E-11           | 8.626E-10           | 1.957E-08           | 1.003E-07           | 5.333E-06           |
| 350                | 1.152E-11           | 7.007E-11           | 7.137E-10           | 1.484E-08           | 7.267E-08           | 3.439E-06           |
| 360                | 1.090E-11           | 6.250E-11           | 5.967E-10           | 1.143E-08           | 5.358E-08           | 2.273E-06           |
| 370                | 1.035E-11           | 5.609E-11           | 5.038E-10           | 8.927E-09           | 4.016E-08           | 1.536E-06           |

|     |           |           |           |           |           |           |
|-----|-----------|-----------|-----------|-----------|-----------|-----------|
| 380 | 9.858E-12 | 5.063E-11 | 4.291E-10 | 7.064E-09 | 3.056E-08 | 1.060E-06 |
| 390 | 9.410E-12 | 4.594E-11 | 3.685E-10 | 5.657E-09 | 2.359E-08 | 7.451E-07 |
| 400 | 9.003E-12 | 4.189E-11 | 3.189E-10 | 4.581E-09 | 1.844E-08 | 5.333E-07 |
| 410 | 8.632E-12 | 3.837E-11 | 2.780E-10 | 3.748E-09 | 1.459E-08 | 3.879E-07 |
| 420 | 8.294E-12 | 3.529E-11 | 2.438E-10 | 3.095E-09 | 1.168E-08 | 2.865E-07 |
| 430 | 7.983E-12 | 3.258E-11 | 2.152E-10 | 2.580E-09 | 9.439E-09 | 2.146E-07 |
| 440 | 7.697E-12 | 3.019E-11 | 1.910E-10 | 2.168E-09 | 7.706E-09 | 1.628E-07 |
| 450 | 7.434E-12 | 2.807E-11 | 1.705E-10 | 1.836E-09 | 6.347E-09 | 1.251E-07 |
| 460 | 7.190E-12 | 2.619E-11 | 1.529E-10 | 1.566E-09 | 5.273E-09 | 9.723E-08 |
| 470 | 6.965E-12 | 2.450E-11 | 1.377E-10 | 1.345E-09 | 4.415E-09 | 7.637E-08 |
| 480 | 6.755E-12 | 2.298E-11 | 1.246E-10 | 1.162E-09 | 3.724E-09 | 6.060E-08 |
| 490 | 6.560E-12 | 2.162E-11 | 1.132E-10 | 1.010E-09 | 3.163E-09 | 4.854E-08 |
| 500 | 6.378E-12 | 2.038E-11 | 1.033E-10 | 8.833E-10 | 2.704E-09 | 3.923E-08 |

**Table S5.** Coefficients of fitted expressions of the  $\omega$ B97XD/6-31G(d)-derived intermolecular potential for the  $(C_{60})_2$  non-covalent dimer. Fitting parameters for the Ryd6 analytical potential are shown in Tab. S2.

| Girifalco Potential [1]                                                                                                                                                                                                                 |                                                |                 |             |
|-----------------------------------------------------------------------------------------------------------------------------------------------------------------------------------------------------------------------------------------|------------------------------------------------|-----------------|-------------|
| $U(R) = -\frac{N^2 A}{12(2r)^6} \left( \frac{1}{s(s-1)^3} + \frac{1}{s(s+1)^3} - \frac{2}{s^4} \right) + \frac{N^2 B}{90(2r)^{12}} \left( \frac{1}{s(s-1)^9} + \frac{1}{s(s+1)^9} - \frac{2}{s^{10}} \right),$                          |                                                |                 |             |
| <p>with, <math>s = -\frac{R}{2r}</math>, and <math>r</math> is the radius of the fullerenes, taken to be 3.55Å by Girifalco and <math>N = 60</math> is the number of carbon atoms of the fullerene.</p>                                 |                                                |                 |             |
| $A(\text{\AA}^6 \cdot kcal \cdot mol^{-1})$                                                                                                                                                                                             | $B(\text{\AA}^{12} \cdot kcal \cdot mol^{-1})$ | $\bar{R}^2$     |             |
| 420.80178                                                                                                                                                                                                                               | 617489.63712                                   | 0.98358         |             |
| Smith-Thakkar Potential [2]                                                                                                                                                                                                             |                                                |                 |             |
| $U(R) = \frac{A}{(R^2 - d^2)^6} - \frac{B}{(R^2 - d^2)^3}$                                                                                                                                                                              |                                                |                 |             |
| $A(\text{\AA}^{12} \cdot kcal \cdot mol^{-1})$                                                                                                                                                                                          | $B(\text{\AA}^6 \cdot kcal \cdot mol^{-1})$    | $d(\text{\AA})$ | $\bar{R}^2$ |
| $7.96778 \times 10^{10}$                                                                                                                                                                                                                | $1.4149 \times 10^6$                           | 7.24689         | 0.99577     |
| Lim Potential [3]                                                                                                                                                                                                                       |                                                |                 |             |
| $U(R) = D \left[ \frac{n}{m-n} \left( \frac{L}{R} \right)^{\frac{m}{2}} e^{\frac{m}{2} \left( 1 - \frac{R}{L} \right)} - \frac{m}{m-n} \left( \frac{L}{R} \right)^{\frac{n}{2}} e^{\frac{n}{2} \left( 1 - \frac{R}{L} \right)} \right]$ |                                                |                 |             |
| $D(kcal \cdot mol^{-1})$                                                                                                                                                                                                                | $m$ and $n$                                    | $L(\text{\AA})$ | $\bar{R}^2$ |
| 6.36667                                                                                                                                                                                                                                 | 33.8038 and 9.1112                             | 10.06369        | 0.99725     |

**Table S6.** Electron density  $\rho_{cp}$  (in  $e/a_0^3$ ), the Laplacian of the electron density  $\nabla^2\rho_{cp}$  (in  $e/a_0^5$ ) and the total energy  $H_{BCP}$  (in Hartree) associated with the bond critical point occurring along the bond path connecting each monomer for the  $(C_{20})_2$ ,  $(C_{24})_2$ ,  $(C_{36})_2$ ,  $(C_{60})_2$ ,  $(C_{70})_2$  and  $(C_{84})_2$  dimers, separated by a distance  $R_e$ .

| Dimers       | QTAIM topological parameters |       |                            |                                    |                         |
|--------------|------------------------------|-------|----------------------------|------------------------------------|-------------------------|
|              | CP                           | Index | $\rho_{CP} \times 10^{-3}$ | $\nabla^2\rho_{CP} \times 10^{-2}$ | $H_{CP} \times 10^{-4}$ |
| $(C_{20})_2$ | BCP                          | 1     | 4.4568                     | 1.2563                             | 6.3101                  |
|              | BCP                          | 2     | 6.2001                     | 1.8118                             | 8.9895                  |
|              | BCP                          | 3     | 5.8758                     | 1.5980                             | 7.4308                  |
|              | RCP                          | 4     | 3.7311                     | 1.0302                             | 5.0755                  |
|              | RCP                          | 5     | 3.5599                     | 1.2066                             | 5.9805                  |
|              | RCP                          | 6     | 4.3480                     | 1.2725                             | 6.3435                  |
|              | RCP                          | 7     | 5.5169                     | 1.5654                             | 7.5710                  |
|              | CCP                          | 8     | 3.5296                     | 1.1103                             | 5.3195                  |
|              | CCP                          | 9     | 3.5563                     | 1.2515                             | 6.1566                  |
| $(C_{24})_2$ | BCP                          | 1     | 5.3661                     | 1.5663                             | 7.9016                  |
|              | BCP                          | 2     | 8.0237                     | 2.3419                             | 1.1115                  |
|              | RCP                          | 3     | 4.4836                     | 1.3144                             | 6.3568                  |
|              | RCP                          | 4     | 4.8776                     | 1.3915                             | 6.6206                  |
|              | CCP                          | 5     | 3.7929                     | 1.3281                             | 6.1190                  |
| $(C_{36})_2$ | BCP                          | 1     | 5.7331                     | 1.5779                             | 7.3033                  |
|              | BCP                          | 2     | 6.0909                     | 1.8813                             | 9.4612                  |
|              | BCP                          | 3     | 5.7072                     | 1.5697                             | 7.2770                  |
|              | RCP                          | 4     | 5.2735                     | 1.5049                             | 7.0835                  |
|              | RCP                          | 5     | 4.4032                     | 1.3160                             | 6.2448                  |
|              | RCP                          | 6     | 4.1315                     | 1.2490                             | 5.8825                  |

|              |     |   |        |        |        |
|--------------|-----|---|--------|--------|--------|
|              | RCP | 7 | 5.4473 | 1.5517 | 7.3004 |
|              | CCP | 8 | 4.0323 | 1.3305 | 5.8395 |
|              | CCP | 9 | 3.9658 | 1.2994 | 5.7515 |
| $(C_{60})_2$ | BCP | 1 | 6.6077 | 2.0247 | 1.0074 |
|              | BCP | 2 | 6.6040 | 2.0235 | 1.0068 |
|              | RCP | 3 | 5.2660 | 1.7879 | 8.4140 |
| $(C_{70})_2$ | BCP | 1 | 5.5690 | 1.5873 | 7.5764 |
|              | BCP | 2 | 5.5388 | 1.5748 | 7.5083 |
|              | BCP | 3 | 5.5690 | 1.5873 | 7.5764 |
|              | BCP | 4 | 5.5388 | 1.5748 | 7.5083 |
|              | RCP | 5 | 5.4401 | 1.4766 | 6.8657 |
|              | RCP | 6 | 3.8613 | 1.1319 | 5.5652 |
|              | RCP | 7 | 3.8092 | 1.1181 | 5.5068 |
|              | RCP | 8 | 5.4401 | 1.4766 | 6.8657 |
|              | CCP | 9 | 1.8620 | 8.8365 | 4.4566 |
| $(C_{84})_2$ | BCP | 1 | 5.4192 | 1.6214 | 8.1633 |
|              | BCP | 2 | 5.4316 | 1.6254 | 8.1823 |
|              | BCP | 3 | 5.4306 | 1.6251 | 8.1798 |
|              | BCP | 4 | 5.4583 | 1.6339 | 8.2199 |
|              | BCP | 5 | 5.4567 | 1.6334 | 8.2188 |
|              | BCP | 6 | 5.4726 | 1.6382 | 8.2399 |
|              | RCP | 7 | 4.9567 | 1.4543 | 7.2929 |
|              | RCP | 8 | 4.9552 | 1.4544 | 7.2948 |
|              | RCP | 9 | 4.9735 | 1.4601 | 7.3244 |

|     |    |        |        |        |
|-----|----|--------|--------|--------|
| RCP | 10 | 4.9724 | 1.4597 | 7.3225 |
| RCP | 11 | 4.9923 | 1.4658 | 7.3538 |
| RCP | 12 | 4.9925 | 1.4654 | 7.3503 |

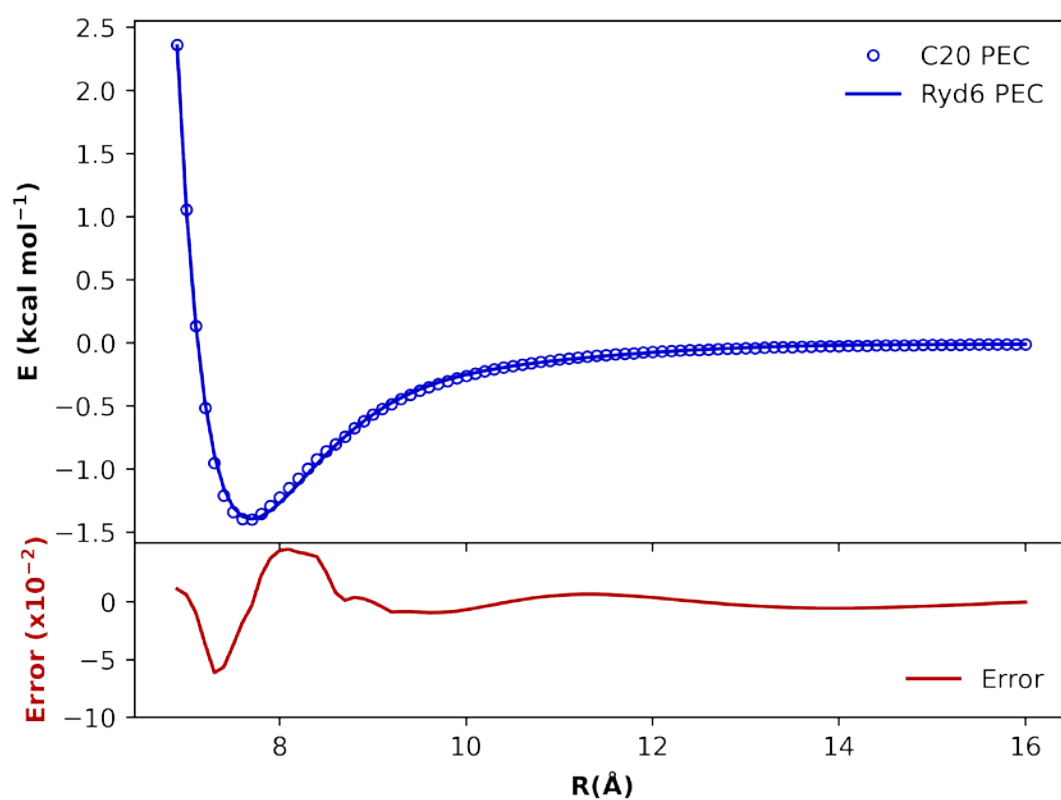

**Figure S1.** Potential energy curves (top) fitted with analytic Rydberg function for the  $(\text{C}_{20})_2$  dimer calculated at  $\omega\text{B97xD/6-31G(d)}$  level of theory. Point by point error (bottom) is also plotted to magnify the overall fitting accuracy in the entire range of internuclear separation.

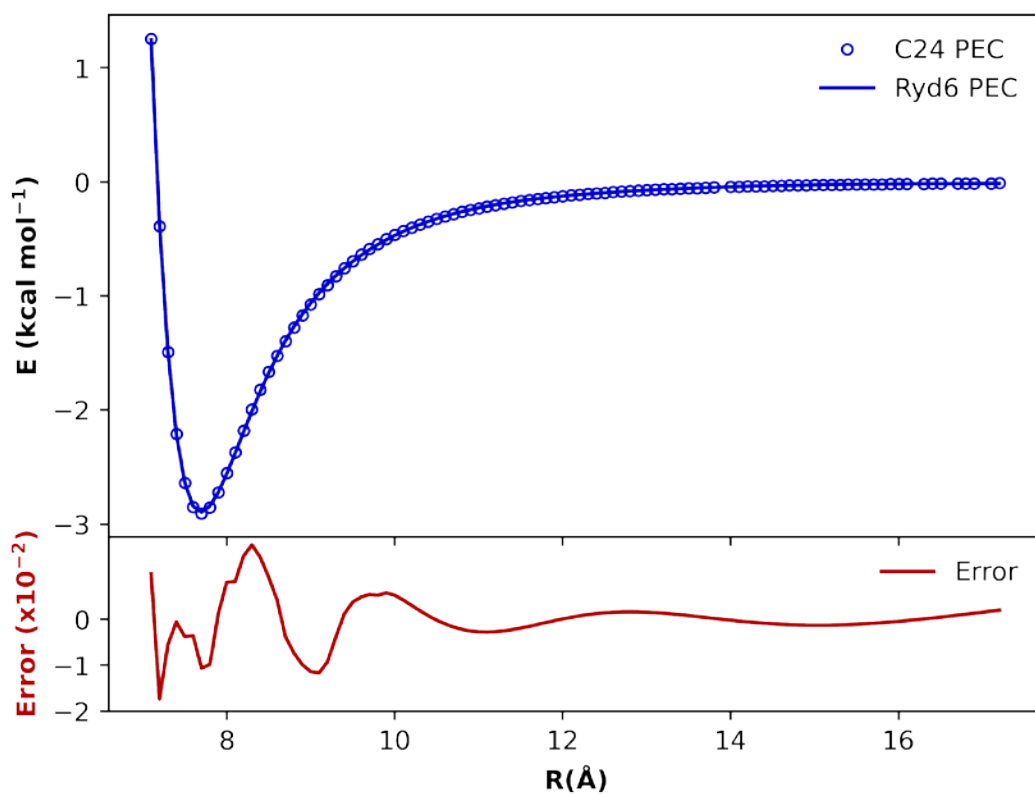

**Figure S2.** Potential energy curves (top) fitted with analytic Rydberg function for the  $(\text{C}_{24})_2$  dimer calculated at  $\omega\text{B97xD/6-31G(d)}$  level of theory. Point by point error (bottom) is also plotted to magnify the overall fitting accuracy in the entire range of internuclear separation.



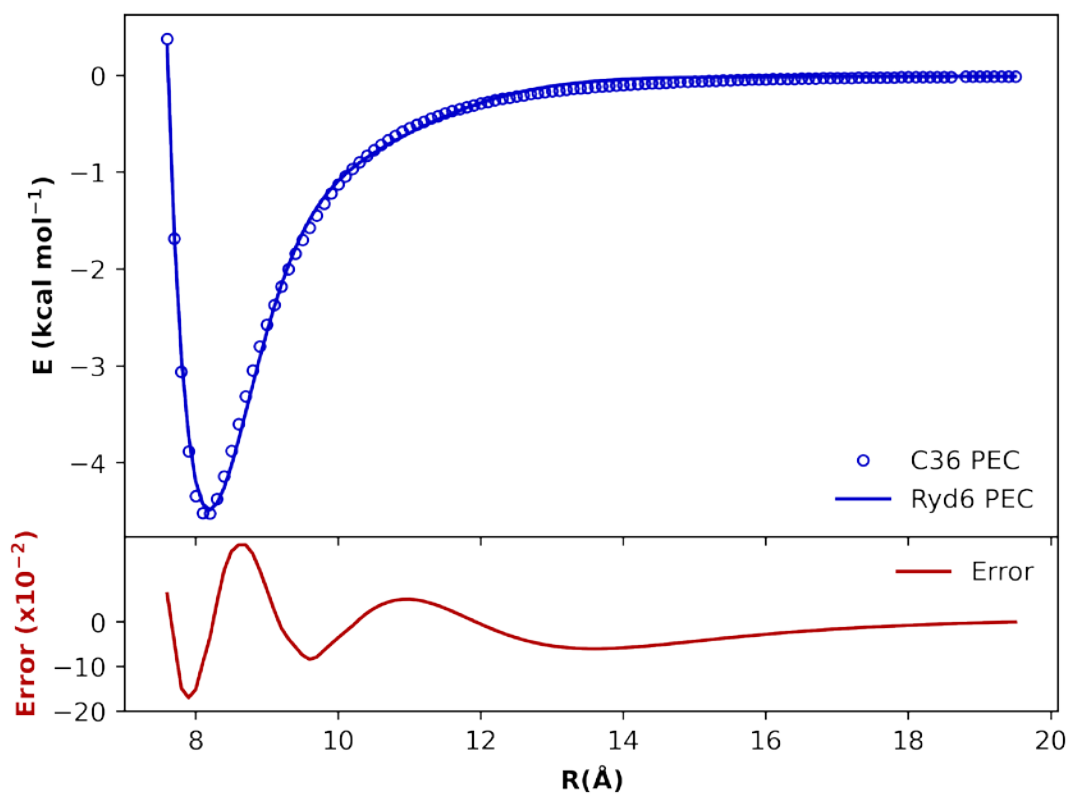

**Figure S3.** Potential energy curves (top) fitted with analytic Rydberg function for the  $(\text{C}_{36})_2$  dimer calculated at  $\omega\text{B97xD/6-31G(d)}$  level of theory. Point by point error (bottom) is also plotted to magnify the overall fitting accuracy in the entire range of internuclear separation.

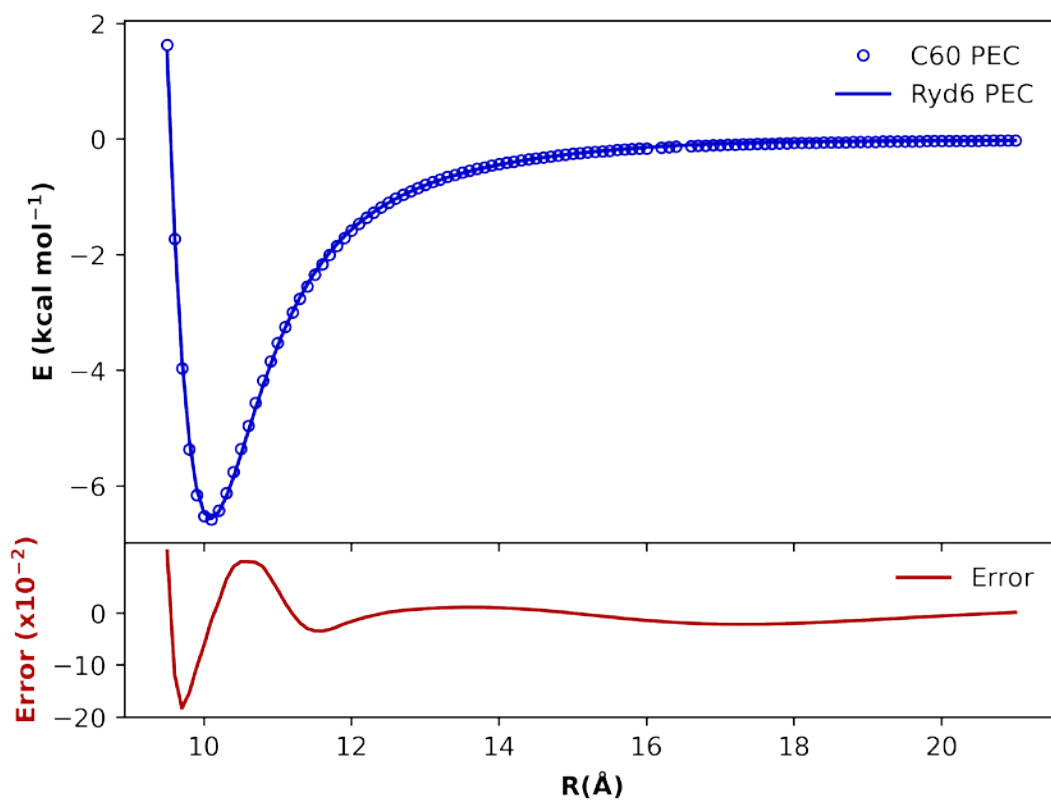

**Figure S4.** Potential energy curves (top) fitted with analytic Rydberg function for the  $(\text{C}_{60})_2$  dimer calculated at  $\omega\text{B97xD/6-31G(d)}$  level of theory. Point by point error (bottom) is also plotted to magnify the overall fitting accuracy in the entire range of internuclear separation.

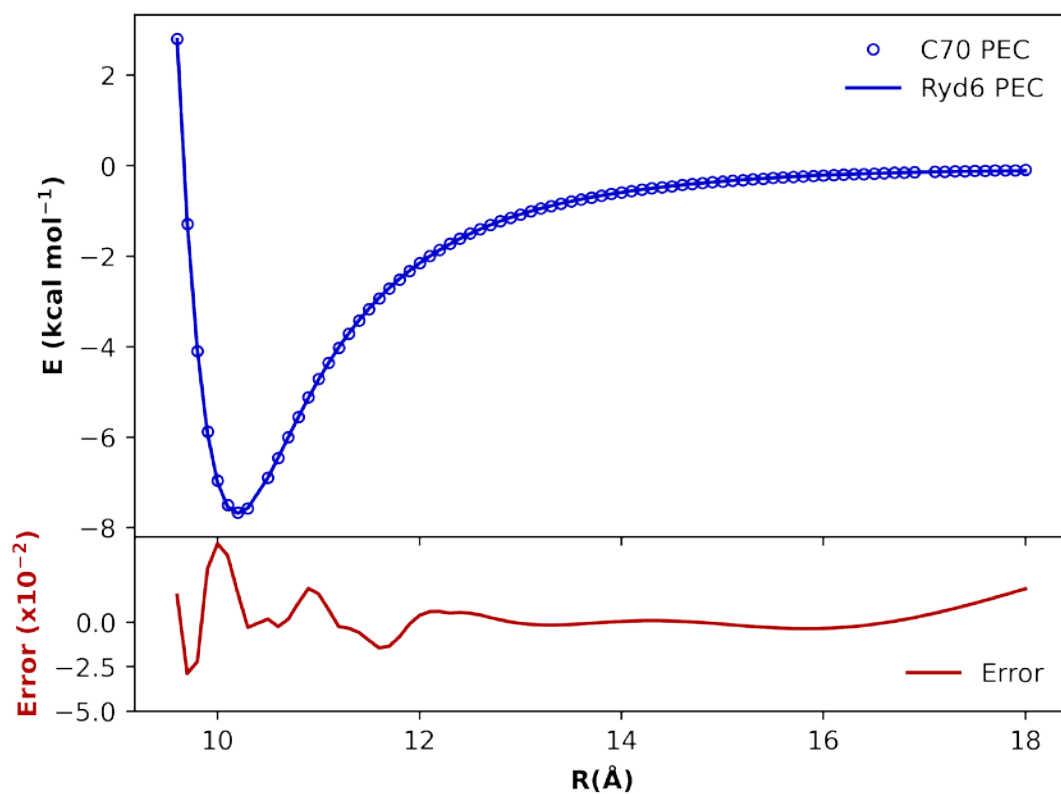

**Figure S5.** Potential energy curves (top) fitted with analytic Rydberg function for the  $(\text{C}_{70})_2$  dimer calculated at  $\omega\text{B97xD/6-31G(d)}$  level of theory. Point by point error (bottom) is also plotted to magnify the overall fitting accuracy in the entire range of internuclear separation.

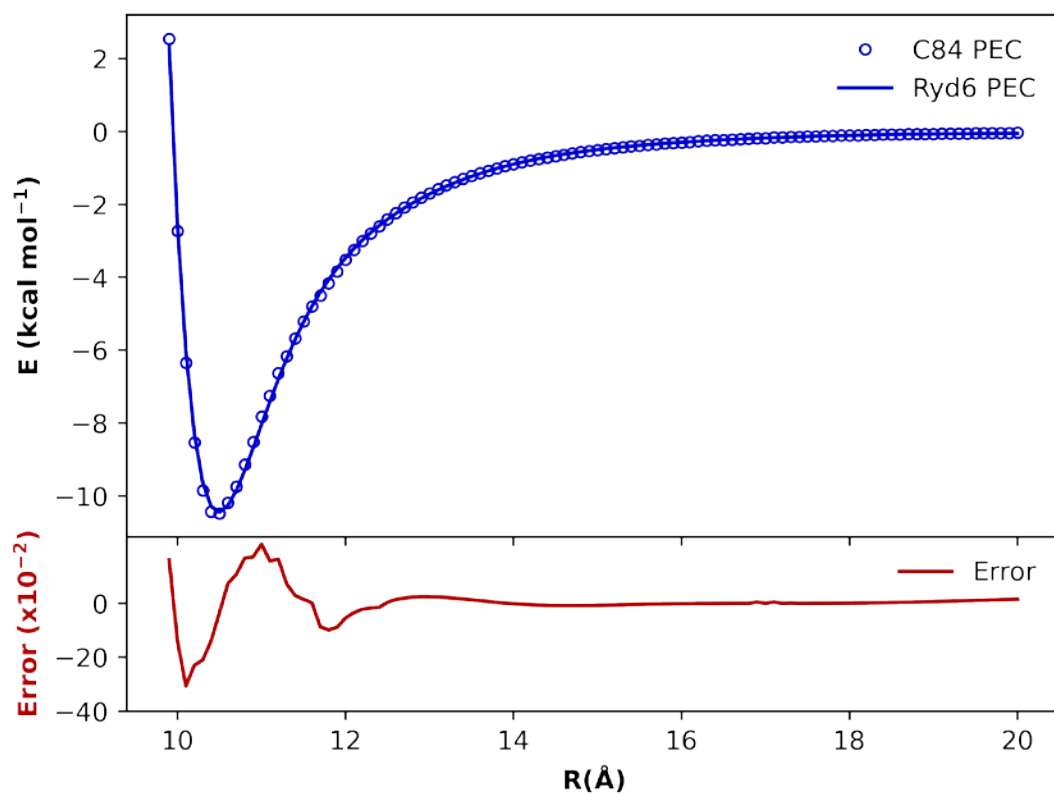

**Figure S6.** Potential energy curves (top) fitted with analytic Rydberg function for the  $(\text{C}_{84})_2$  dimer calculated at  $\omega\text{B97xD/6-31G(d)}$  level of theory. Point by point error (bottom) is also plotted to magnify the overall fitting accuracy in the entire range of internuclear separation.

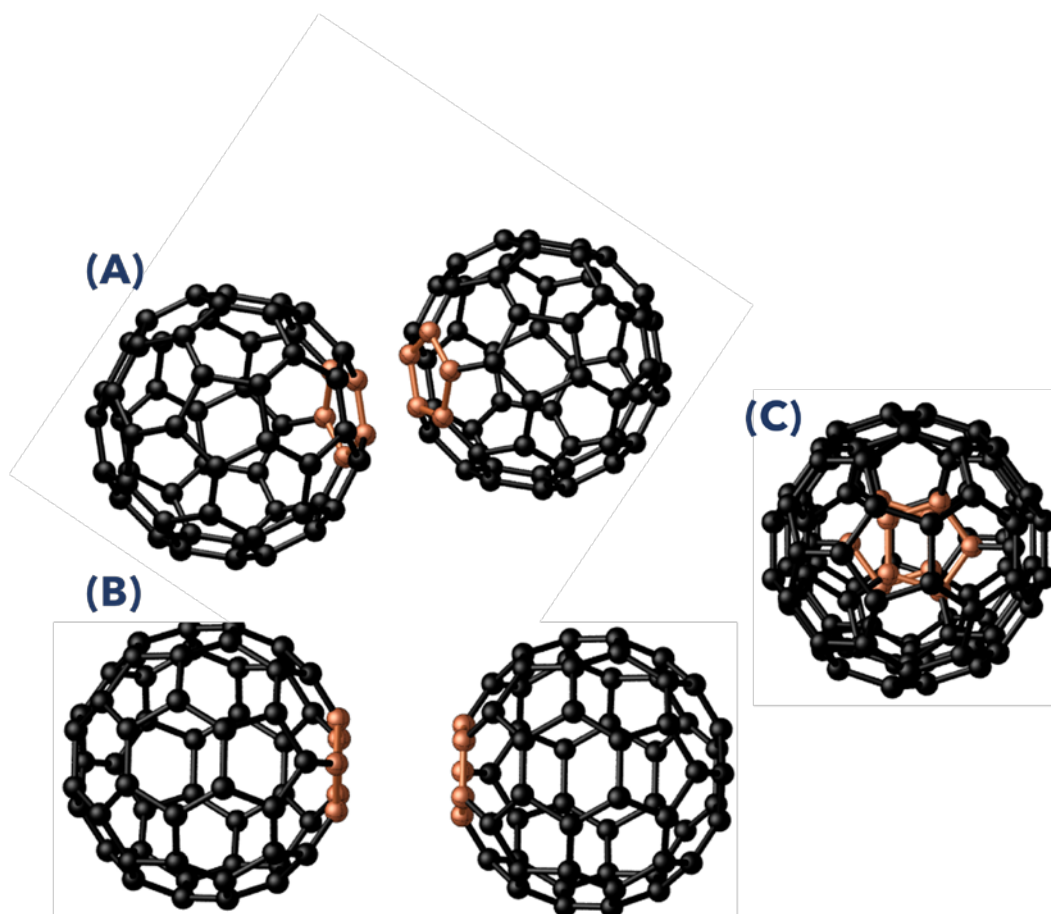

**Figure S7.** (A) Optimized C<sub>60</sub>-fullerene dimer as determined from  $\omega$ B97xD/6–31G(d) calculation depicting the most stable orientation, where the pentagon of C<sub>60</sub> faces the inter-pentagon bond of the adjacent monomer. (B) side view and (C) superimposed view to highlight the relative orientation between the monomers.

**Table S7.** Coordinates for the C<sub>20</sub>, C<sub>24</sub>, C<sub>36</sub>, C<sub>60</sub>, C<sub>70</sub> and C<sub>84</sub> optimized fullerenes.

| C <sub>20</sub> |             |             |             |  |
|-----------------|-------------|-------------|-------------|--|
| C               | -1.17424900 | 1.18813100  | -1.10398800 |  |
| C               | 0.00011000  | 0.73578000  | -1.80070600 |  |
| C               | -0.76566400 | 1.94690900  | 0.01685100  |  |
| C               | 0.76603500  | 1.94677200  | 0.01688500  |  |
| C               | 1.17452200  | 1.18791000  | -1.10393600 |  |
| C               | -1.17375900 | 1.16564000  | 1.12382200  |  |
| C               | 0.00002000  | 0.70121300  | 1.81334500  |  |
| C               | 1.17392500  | 1.16542200  | 1.12387200  |  |
| C               | -1.96801900 | -0.00628000 | 0.69593200  |  |
| C               | -1.17452300 | -1.18791200 | 1.10393600  |  |
| C               | -0.00011100 | -0.73578000 | 1.80070600  |  |
| C               | -1.96797800 | 0.00664300  | -0.69601100 |  |
| C               | -1.17392600 | -1.16542200 | -1.12387300 |  |

|                 |             |             |             |
|-----------------|-------------|-------------|-------------|
| C               | -0.76603400 | -1.94677000 | -0.01688500 |
| C               | -0.00002000 | -0.70121300 | -1.81334300 |
| C               | 1.17376100  | -1.16564000 | -1.12382200 |
| C               | 0.76566400  | -1.94690700 | -0.01685100 |
| C               | 1.17424900  | -1.18813100 | 1.10398900  |
| C               | 1.96797700  | -0.00664300 | 0.69601100  |
| C               | 1.96802000  | 0.00627900  | -0.69593300 |
| C <sub>24</sub> |             |             |             |
| C               | -1.81487400 | -1.23980200 | 1.01859700  |
| C               | -1.86280400 | 0.05950500  | 1.68481100  |
| C               | -2.96293000 | -1.90865000 | 1.28189700  |
| C               | -3.28151700 | 0.24757500  | 2.21608500  |
| C               | -3.95335300 | -0.97533900 | 1.97367000  |
| C               | -3.56581600 | -2.32560600 | 0.01822000  |
| C               | -4.85757500 | -1.91878600 | -0.00513200 |
| C               | -5.12578100 | -0.99397900 | 1.17937200  |
| C               | -2.79162100 | -1.64004900 | -1.10469100 |
| C               | -1.70481200 | -0.97950100 | -0.48146400 |
| C               | -1.55206600 | 0.42128000  | -0.62332900 |
| C               | -3.72549200 | -0.89981300 | -1.86984200 |
| C               | -3.57266400 | 0.50100000  | -2.01178200 |
| C               | -2.48606800 | 1.16158300  | -1.38853100 |
| C               | -5.08633200 | -1.14544000 | -1.22326900 |
| C               | -2.65727700 | 2.01735200  | 0.80092500  |
| C               | -1.58422500 | 1.02624000  | 0.77795200  |
| C               | -3.10484800 | 2.20651700  | -0.46344400 |
| C               | -4.55192000 | 2.00719000  | -0.48615800 |
| C               | -4.85577200 | 1.12068900  | -1.46416600 |
| C               | -5.65197000 | 0.03911200  | -0.88921300 |
| C               | -3.78219900 | 1.45187600  | 1.66415000  |
| C               | -4.95462000 | 1.43338000  | 0.86991100  |
| C               | -5.62639900 | 0.21042500  | 0.62747100  |
| C <sub>36</sub> |             |             |             |
| C               | -1.41065800 | -1.72915300 | 1.50394700  |
| C               | 1.41077000  | -1.72956800 | 1.50422500  |
| C               | 0.72002500  | -2.42201600 | 0.47118800  |
| C               | -0.71996400 | -2.42211800 | 0.47119900  |
| C               | -2.60358100 | -1.05914200 | 0.92120200  |
| C               | -2.60379200 | 0.26797600  | 1.37752900  |
| C               | -2.60389100 | 1.32709500  | 0.45638500  |
| C               | -2.60380800 | -1.32712800 | -0.45635400 |
| C               | -2.60388600 | -0.26801700 | -1.37749200 |
| C               | -2.60354200 | 1.05899400  | -0.92106000 |
| C               | 0.71995800  | -1.61909600 | -1.86173900 |
| C               | -0.71983000 | -1.61913800 | -1.86182300 |
| C               | -1.41101000 | -2.16699600 | -0.74564300 |
| C               | 1.41116300  | -2.16746500 | -0.74584400 |
| C               | -0.71985500 | 2.42240800  | -0.47137300 |
| C               | -1.41087500 | 2.16693100  | 0.74559700  |
| C               | 0.72006500  | 2.42229300  | -0.47134300 |
| C               | -1.41037500 | 1.72897900  | -1.50378400 |
| C               | -0.71982100 | 1.61934100  | 1.86163700  |
| C               | -1.41088900 | 0.43803500  | 2.24930300  |
| C               | 0.71996700  | 1.61925500  | 1.86157700  |
| C               | 1.41111800  | 2.16732900  | 0.74582500  |
| C               | 1.41105100  | 0.43803200  | 2.24977900  |
| C               | 0.72003600  | -0.80251700 | 2.33330600  |
| C               | -0.71996900 | -0.80253400 | 2.33338300  |
| C               | 2.60355600  | 1.32707000  | 0.45647700  |
| C               | 2.60347300  | 0.26790700  | 1.37764400  |

|                 |             |             |             |
|-----------------|-------------|-------------|-------------|
| C               | 2.60319300  | -1.05925000 | 0.92122700  |
| C               | 2.60329500  | 1.05904600  | -0.92105500 |
| C               | -0.71986800 | 0.80274100  | -2.33361500 |
| C               | 0.72006600  | 0.80270200  | -2.33355000 |
| C               | 1.41064300  | 1.72933100  | -1.50401700 |
| C               | -1.41076600 | -0.43799700 | -2.24921900 |
| C               | 1.41098800  | -0.43804800 | -2.24964600 |
| C               | 2.60352900  | -0.26803600 | -1.37749500 |
| C               | 2.60348700  | -1.32724500 | -0.45638100 |
| C <sub>60</sub> |             |             |             |
| C               | 1.23569700  | -0.01848000 | 3.31193200  |
| C               | 2.33652700  | 0.58614400  | 2.58788200  |
| C               | 2.19870400  | 1.85714000  | 2.05260300  |
| C               | 0.95418200  | 2.58222400  | 2.21814300  |
| C               | -0.09834300 | 2.00430000  | 2.91049500  |
| C               | 0.04594300  | 0.67473900  | 3.46981900  |
| C               | 1.21422100  | -1.43278700 | 2.99512800  |
| C               | 2.30153700  | -1.70217400 | 2.07499800  |
| C               | 2.99532800  | -0.45437100 | 1.82343400  |
| C               | 3.48715800  | -0.17804000 | 0.55742000  |
| C               | 2.71345600  | 2.14656800  | 0.72869000  |
| C               | 0.69961700  | 3.31951300  | 0.99633800  |
| C               | -0.59593000 | 3.44581500  | 0.52031700  |
| C               | -1.69675000 | 2.84123800  | 1.24456300  |
| C               | -1.45356500 | 2.13661100  | 2.41296500  |
| C               | -2.14689100 | 0.88877100  | 2.66465000  |
| C               | -1.22012700 | -0.01453900 | 3.31808700  |
| C               | -1.24080500 | -1.36693800 | 3.01532600  |
| C               | 0.00352300  | -2.09178300 | 2.84981500  |
| C               | 2.12997900  | -2.61925200 | 1.05000200  |
| C               | 0.86367700  | -3.30848300 | 0.89781900  |
| C               | -0.17575400 | -3.05087000 | 1.77768800  |
| C               | -1.53085000 | -2.91885300 | 1.28003200  |
| C               | -2.18876800 | -1.87770100 | 2.04479700  |
| C               | -3.07472300 | -1.01391200 | 1.42029600  |
| C               | -3.05330300 | 0.40051000  | 1.73677900  |
| C               | -3.30782300 | 1.13741900  | 0.51457600  |
| C               | -2.64461700 | 2.33042200  | 0.27386700  |
| C               | 1.78677400  | 3.05007200  | 0.07589600  |
| C               | -1.21422100 | 1.43278700  | -2.99512800 |
| C               | -0.00352300 | 2.09178300  | -2.84981500 |
| C               | 1.24080500  | 1.36693800  | -3.01532600 |
| C               | 1.22012700  | 0.01453900  | -3.31808700 |
| C               | -0.04594300 | -0.67473900 | -3.46981900 |
| C               | -2.33652700 | -0.58614400 | -2.58788200 |
| C               | -2.99532800 | 0.45437100  | -1.82343400 |
| C               | -2.30153700 | 1.70217400  | -2.07499800 |
| C               | -2.12997900 | 2.61925200  | -1.05000200 |
| C               | -0.86367700 | 3.30848300  | -0.89781900 |
| C               | 0.17575400  | 3.05087000  | -1.77768800 |
| C               | 2.18876800  | 1.87770100  | -2.04479700 |
| C               | 3.07472300  | 1.01391200  | -1.42029600 |
| C               | 3.05330300  | -0.40051000 | -1.73677900 |
| C               | 2.14689100  | -0.88877100 | -2.66465000 |
| C               | 1.45356500  | -2.13661100 | -2.41296500 |
| C               | 0.09834300  | -2.00430000 | -2.91049500 |
| C               | -0.95418200 | -2.58222400 | -2.21814300 |
| C               | -2.19870400 | -1.85714000 | -2.05260300 |
| C               | -3.48715800 | 0.17804000  | -0.55742000 |
| C               | -3.34288300 | -1.15143200 | 0.00244400  |

|                 |             |             |             |
|-----------------|-------------|-------------|-------------|
| C               | -2.71345600 | -2.14656800 | -0.72869000 |
| C               | -1.78677400 | -3.05007200 | -0.07589600 |
| C               | -0.69961700 | -3.31951300 | -0.99633800 |
| C               | 0.59593000  | -3.44581500 | -0.52031700 |
| C               | 1.69675000  | -2.84123800 | -1.24456300 |
| C               | 2.64461700  | -2.33042200 | -0.27386700 |
| C               | 3.30782300  | -1.13741900 | -0.51457600 |
| C               | 1.53085000  | 2.91885300  | -1.28003200 |
| C               | 3.34288300  | 1.15143200  | -0.00244400 |
| C               | -1.23569700 | 0.01848000  | -3.31193200 |
| C <sub>70</sub> |             |             |             |
| C               | -3.96479100 | 0.41077500  | 1.16109500  |
| C               | -3.21645200 | 0.80063500  | 2.26326400  |
| C               | -2.43763000 | -0.17024700 | 2.99455200  |
| C               | -2.43746000 | -1.48995300 | 2.60310400  |
| C               | -3.21622500 | -1.90511700 | 1.46084800  |
| C               | -3.96452200 | -0.97732600 | 0.74943300  |
| C               | 2.43754800  | -2.93625100 | -0.61255400 |
| C               | 3.21624200  | -1.97810300 | -1.36040400 |
| C               | 3.96454300  | -1.01481100 | -0.69785400 |
| C               | 2.43746900  | -1.62250100 | -2.52259100 |
| C               | 2.43762700  | -0.32480000 | -2.98174700 |
| C               | 3.21647700  | 0.68254900  | -2.30161900 |
| C               | 3.96482700  | 0.35014500  | -1.18081200 |
| C               | 2.43748900  | 1.89776900  | -2.32260400 |
| C               | 2.43756100  | 2.73558200  | -1.23019400 |
| C               | 3.21674900  | 2.40023500  | -0.06207300 |
| C               | 2.43755100  | 2.79553600  | 1.08716900  |
| C               | 2.43747500  | 2.01532200  | 2.22142800  |
| C               | -1.19944700 | -2.24696000 | 2.61890300  |
| C               | 0.00000000  | -1.69025500 | 3.11803200  |
| C               | 0.00000000  | -0.28297300 | 3.53543800  |
| C               | -1.19950700 | 0.45572300  | 3.42039900  |
| C               | 1.19958500  | 1.79658000  | 2.94624200  |
| C               | -1.19958500 | 1.79658000  | 2.94624200  |
| C               | 0.00000000  | 2.44334900  | 2.57089100  |
| C               | 0.00000000  | 3.27533000  | 1.36170400  |
| C               | -1.19959600 | 3.39397300  | 0.62352800  |
| C               | -1.19960600 | 3.35719300  | -0.79812000 |
| C               | -2.43755500 | -2.90066400 | 0.76347400  |
| C               | -2.43754800 | -2.93625100 | -0.61255400 |
| C               | -3.21624200 | -1.97810300 | -1.36040400 |
| C               | -3.96454300 | -1.01481100 | -0.69785400 |
| C               | -2.43746900 | -1.62250000 | -2.52259000 |
| C               | -2.43762700 | -0.32480000 | -2.98174600 |
| C               | -3.21647800 | 0.68254900  | -2.30161900 |
| C               | -3.96482800 | 0.35014500  | -1.18081200 |
| C               | -2.43748900 | 1.89776900  | -2.32260400 |
| C               | -2.43756200 | 2.73558200  | -1.23019400 |
| C               | -3.21675000 | 2.40023500  | -0.06207300 |
| C               | -3.96482800 | 1.23135600  | -0.03186200 |
| C               | -2.43755100 | 2.79553500  | 1.08716900  |
| C               | -2.43747500 | 2.01532200  | 2.22142800  |
| C               | 3.96479100  | 0.41077500  | 1.16109500  |
| C               | 3.21645200  | 0.80063500  | 2.26326400  |
| C               | 2.43763000  | -0.17024700 | 2.99455200  |
| C               | 2.43746000  | -1.48995300 | 2.60310400  |
| C               | 3.21622500  | -1.90511700 | 1.46084800  |
| C               | 3.96452200  | -0.97732700 | 0.74943300  |
| C               | 2.43755400  | -2.90066400 | 0.76347300  |



|                 |             |             |             |
|-----------------|-------------|-------------|-------------|
| C               | 0.00000000  | 3.20053800  | -1.52916200 |
| C               | 0.00000000  | 2.30718300  | -2.69376200 |
| C               | -1.19960000 | 1.64188300  | -3.03515500 |
| C               | -1.19951700 | 0.27833500  | -3.43937200 |
| C               | 0.00000000  | -0.46529400 | -3.51607000 |
| C               | 0.00000000  | -1.84913300 | -3.02651100 |
| C               | -1.19945500 | -2.37930200 | -2.49928400 |
| C               | 1.19944000  | -3.18528400 | -1.32758800 |
| C               | 0.00000000  | -3.48820600 | -0.64403200 |
| C               | 0.00000000  | -3.45026200 | 0.82342700  |
| C               | 1.19944900  | -3.11240700 | 1.49041600  |
| C               | 1.19944700  | -2.24696000 | 2.61890300  |
| C               | 1.19950700  | 0.45572200  | 3.42039900  |
| C               | 1.19959600  | 3.39397300  | 0.62352900  |
| C               | 1.19960600  | 3.35719300  | -0.79812000 |
| C               | 1.19960000  | 1.64188300  | -3.03515500 |
| C               | 1.19951700  | 0.27833400  | -3.43937200 |
| C               | 1.19945500  | -2.37930200 | -2.49928500 |
| C               | -1.19944000 | -3.18528400 | -1.32758800 |
| C               | -1.19944900 | -3.11240700 | 1.49041700  |
| C               | 3.96482800  | 1.23135600  | -0.03186200 |
| C <sub>84</sub> |             |             |             |
| C               | -0.38918300 | -4.10758400 | 1.19556800  |
| C               | -1.14520900 | -4.10052300 | 0.00000800  |
| C               | -0.38918200 | -4.10760300 | -1.19555100 |
| C               | 1.02063500  | -3.99778100 | 1.19556200  |
| C               | 1.76646600  | -3.87371800 | 0.00001700  |
| C               | 1.02065400  | -3.99779600 | -1.19552900 |
| C               | -2.47159900 | -3.46653700 | -0.00001300 |
| C               | -2.95186400 | -2.88279600 | -1.19560200 |
| C               | -0.87840200 | -3.41259400 | 2.37669300  |
| C               | -2.10370400 | -2.82689900 | 2.37662300  |
| C               | -2.95187800 | -2.88272100 | 1.19559200  |
| C               | 2.51619600  | -2.46700400 | 2.37667500  |
| C               | 1.39634700  | -3.23538000 | 2.37668400  |
| C               | 0.21560500  | -2.76689000 | 3.04049200  |
| C               | 3.36275200  | -2.39085200 | -1.19558300 |
| C               | 2.97857200  | -3.04199700 | 0.00001900  |
| C               | 3.36274200  | -2.39082800 | 1.19560200  |
| C               | -3.39459100 | -0.94556100 | 2.37669800  |
| C               | -3.75195500 | -1.71676900 | 1.19562900  |
| C               | -4.12387800 | -1.05854200 | -0.00001500 |
| C               | -3.75195900 | -1.71679000 | -1.19561000 |
| C               | -3.50020500 | 0.40839700  | 2.37674300  |
| C               | -2.51608700 | 2.46690800  | 2.37661000  |
| C               | -2.50399100 | 1.19674700  | 3.04048100  |
| C               | -1.39635800 | 3.23544600  | 2.37675300  |
| C               | 2.50392100  | -1.19670700 | 3.04041300  |
| C               | 1.31572800  | -0.62884400 | 3.54949200  |
| C               | 0.11326100  | -1.45389600 | 3.54950500  |
| C               | -1.20248400 | -0.82506700 | 3.54948700  |
| C               | -2.28836000 | -1.57010100 | 3.04045500  |
| C               | 1.20247900  | 0.82510300  | 3.54949000  |
| C               | -0.11330800 | 1.45396100  | 3.54959000  |
| C               | -1.31572300 | 0.62891900  | 3.54949200  |
| C               | -0.21561700 | 2.76693700  | 3.04055000  |
| C               | -3.97249900 | 1.11497500  | 1.19552300  |
| C               | -4.23804600 | 0.40707100  | -0.00007000 |
| C               | -3.97258800 | 1.11492700  | -1.19559100 |
| C               | -3.50019400 | 0.40838300  | -2.37671500 |

|   |             |             |             |
|---|-------------|-------------|-------------|
| C | -3.39459700 | -0.94557800 | -2.37663900 |
| C | -2.97857200 | 3.04201300  | -0.00009900 |
| C | -3.36281000 | 2.39087400  | -1.19564200 |
| C | -3.36269800 | 2.39077900  | 1.19557700  |
| C | -0.87838600 | -3.41262400 | -2.37666500 |
| C | -2.10369700 | -2.82691400 | -2.37664400 |
| C | -2.28834700 | -1.57011800 | -3.04042100 |
| C | -2.50394000 | 1.19673600  | -3.04043600 |
| C | -0.11330400 | 1.45391600  | -3.54953500 |
| C | -1.31570200 | 0.62890000  | -3.54947000 |
| C | -1.20248000 | -0.82510300 | -3.54945000 |
| C | 2.28840500  | 1.57007500  | -3.04047300 |
| C | 1.20253100  | 0.82504700  | -3.54948100 |
| C | 1.31575600  | -0.62885600 | -3.54946800 |
| C | 0.11326900  | -1.45392500 | -3.54949200 |
| C | 0.21560200  | -2.76690600 | -3.04046500 |
| C | -1.39632500 | 3.23535000  | -2.37671800 |
| C | -2.51618200 | 2.46695600  | -2.37674700 |
| C | -0.21562100 | 2.76688300  | -3.04049400 |
| C | -1.02063700 | 3.99777900  | 1.19556600  |
| C | -1.76643900 | 3.87374400  | -0.00006000 |
| C | -1.02065300 | 3.99777800  | -1.19556800 |
| C | 1.39637000  | -3.23540000 | -2.37664100 |
| C | 2.51621600  | -2.46704600 | -2.37666700 |
| C | 2.50397500  | -1.19673600 | -3.04040100 |
| C | 3.75192600  | 1.71672800  | -1.19561700 |
| C | 3.39460100  | 0.94558300  | -2.37674700 |
| C | 3.50012200  | -0.40842100 | -2.37666200 |
| C | 3.75189400  | 1.71677200  | 1.19559400  |
| C | 4.12388200  | 1.05851800  | -0.00000900 |
| C | 0.87844300  | 3.41264700  | -2.37671700 |
| C | 2.95189400  | 2.88278500  | 1.19560800  |
| C | 2.47157500  | 3.46651600  | -0.00001200 |
| C | 2.95190100  | 2.88277900  | -1.19561900 |
| C | 2.10371200  | 2.82692300  | -2.37659100 |
| C | 2.10365400  | 2.82690100  | 2.37660400  |
| C | 0.87840800  | 3.41268700  | 2.37672100  |
| C | 0.38915400  | 4.10756500  | 1.19554400  |
| C | 1.14521300  | 4.10057900  | -0.00004000 |
| C | 0.38924300  | 4.10754700  | -1.19557600 |
| C | 3.50013100  | -0.40838800 | 2.37669500  |
| C | 3.39456300  | 0.94558500  | 2.37669200  |
| C | 2.28836200  | 1.57011000  | 3.04046100  |
| C | 3.97256100  | -1.11499100 | -1.19554200 |
| C | 4.23797200  | -0.40707600 | 0.00000700  |
| C | 3.97256100  | -1.11496800 | 1.19557500  |

**Table S8.** Coordinates for the (C<sub>20</sub>)<sub>2</sub>, (C<sub>24</sub>)<sub>2</sub>, (C<sub>36</sub>)<sub>2</sub>, (C<sub>60</sub>)<sub>2</sub>, (C<sub>70</sub>)<sub>2</sub> and (C<sub>84</sub>)<sub>2</sub> dimers at the equilibrium point.

| (C <sub>20</sub> ) <sub>2</sub> |             |             |             |  |
|---------------------------------|-------------|-------------|-------------|--|
| C                               | 3.47264300  | -1.57117800 | 1.37287100  |  |
| C                               | 2.53609300  | -1.92609400 | 0.21855600  |  |
| C                               | 2.99096900  | -0.38017300 | 1.94434100  |  |
| C                               | 1.81628000  | 0.02109500  | 1.21269700  |  |
| C                               | 1.54711200  | -0.92617300 | 0.16430000  |  |
| C                               | 4.00498300  | 0.70595000  | 1.82510700  |  |
| C                               | 3.39601600  | 1.72177700  | 0.95946600  |  |
| C                               | 2.06284300  | 1.30540300  | 0.61847200  |  |
| C                               | 5.08672900  | 0.18368500  | 1.12042300  |  |
| C                               | 5.13196600  | 0.90498100  | -0.18514100 |  |
| C                               | 4.14096900  | 1.90271300  | -0.23919500 |  |
| C                               | 4.71598700  | -1.19731700 | 0.78725800  |  |
| C                               | 4.61633100  | -1.32860600 | -0.63988500 |  |
| C                               | 4.85923500  | -0.04288400 | -1.23303900 |  |
| C                               | 3.28079600  | -1.74313700 | -0.97905600 |  |
| C                               | 2.67254100  | -0.72796000 | -1.84633300 |  |
| C                               | 3.68626200  | 0.35755000  | -1.96697500 |  |
| C                               | 3.20410000  | 1.54796300  | -1.39363400 |  |
| C                               | 1.96046600  | 1.17653800  | -0.80932200 |  |
| C                               | 1.59193100  | -0.20441200 | -1.14158300 |  |
| C                               | -1.76529400 | -1.36870900 | -0.13724800 |  |
| C                               | -3.13136500 | -2.04350100 | -0.27951500 |  |
| C                               | -1.79983500 | -0.65418500 | 1.08787800  |  |
| C                               | -3.07382300 | -0.87365700 | 1.71982600  |  |
| C                               | -3.88455000 | -1.70341400 | 0.87134400  |  |
| C                               | -1.60783800 | 0.79262400  | 0.88661500  |  |
| C                               | -2.86772700 | 1.42300300  | 1.36054900  |  |
| C                               | -3.72801200 | 0.39496400  | 1.87973300  |  |
| C                               | -1.56926700 | 0.98431900  | -0.49266400 |  |
| C                               | -2.79211900 | 1.72632700  | -0.85111300 |  |
| C                               | -3.54432900 | 2.06342700  | 0.30111500  |  |
| C                               | -1.71717100 | -0.35149900 | -1.11545700 |  |
| C                               | -2.94951900 | -0.37309600 | -1.85956900 |  |
| C                               | -3.60448800 | 0.89556100  | -1.69830400 |  |
| C                               | -3.80816400 | -1.40076300 | -1.33788600 |  |
| C                               | -5.06843300 | -0.77056100 | -0.86462100 |  |
| C                               | -4.87868600 | 0.67724100  | -1.06813800 |  |
| C                               | -4.91118900 | 1.39040000  | 0.15851300  |  |
| C                               | -4.96209000 | 0.37447700  | 1.13654100  |  |
| C                               | -5.11035200 | -0.96268200 | 0.51307400  |  |
| (C <sub>24</sub> ) <sub>2</sub> |             |             |             |  |
| C                               | -1.81638200 | -1.23963200 | 1.01759000  |  |
| C                               | -1.86447800 | 0.05971400  | 1.68330400  |  |
| C                               | -2.96285100 | -1.91056100 | 1.28239600  |  |
| C                               | -3.28150300 | 0.24789200  | 2.21548200  |  |
| C                               | -3.95350100 | -0.97573000 | 1.97297600  |  |
| C                               | -3.56528700 | -2.32598400 | 0.01825300  |  |
| C                               | -4.85740800 | -1.91907600 | -0.00557400 |  |
| C                               | -5.12561600 | -0.99442600 | 1.17971600  |  |
| C                               | -2.79123500 | -1.64022900 | -1.10455700 |  |
| C                               | -1.70474300 | -0.98034100 | -0.48045500 |  |
| C                               | -1.55574700 | 0.42106200  | -0.62191900 |  |
| C                               | -3.72520700 | -0.90041500 | -1.87074000 |  |
| C                               | -3.57274600 | 0.50061400  | -2.01126700 |  |
| C                               | -2.48589700 | 1.16252900  | -1.38910700 |  |
| C                               | -5.08542900 | -1.14525500 | -1.22245800 |  |
| C                               | -2.65592300 | 2.01899100  | 0.80149500  |  |

|                                 |             |             |             |
|---------------------------------|-------------|-------------|-------------|
| C                               | -1.58274400 | 1.02811600  | 0.77791800  |
| C                               | -3.10463400 | 2.20575100  | -0.46280600 |
| C                               | -4.55182900 | 2.00695000  | -0.48593300 |
| C                               | -4.85597700 | 1.12096900  | -1.46425200 |
| C                               | -5.65130500 | 0.03939000  | -0.88844100 |
| C                               | -3.78142500 | 1.45154400  | 1.66322400  |
| C                               | -4.95512900 | 1.43389300  | 0.86981500  |
| C                               | -5.62593900 | 0.21098900  | 0.62737800  |
| C                               | 5.24176200  | -0.95370200 | -1.34628700 |
| C                               | 5.79003000  | 0.20219300  | -0.64043800 |
| C                               | 4.85614500  | -1.87989100 | -0.43613000 |
| C                               | 5.49452000  | 0.01234500  | 0.84306600  |
| C                               | 4.92829600  | -1.27960700 | 0.96605000  |
| C                               | 3.46254500  | -2.23550900 | -0.68785200 |
| C                               | 2.76192900  | -2.11326800 | 0.46544300  |
| C                               | 3.63346700  | -1.43340500 | 1.51962000  |
| C                               | 2.92199200  | -1.25547600 | -1.72603200 |
| C                               | 4.02970500  | -0.47193300 | -2.13740900 |
| C                               | 3.99862300  | 0.93492800  | -1.98555700 |
| C                               | 1.78637100  | -0.63054200 | -1.16071600 |
| C                               | 1.75286100  | 0.77816400  | -1.00990100 |
| C                               | 2.85931800  | 1.55964800  | -1.41994800 |
| C                               | 1.60994900  | -1.24744600 | 0.22568700  |
| C                               | 4.63300700  | 2.05221000  | 0.05097400  |
| C                               | 5.17419000  | 1.32177100  | -1.09072600 |
| C                               | 3.32361200  | 2.31621800  | -0.17749700 |
| C                               | 2.53944000  | 1.82624000  | 0.95251600  |
| C                               | 1.54903100  | 1.03287700  | 0.47900100  |
| C                               | 1.61278200  | -0.26158200 | 1.15488000  |
| C                               | 4.76895400  | 1.15060600  | 1.27594300  |
| C                               | 3.47592200  | 0.99552400  | 1.82945600  |
| C                               | 2.90848200  | -0.29711700 | 1.95381600  |
| (C <sub>36</sub> ) <sub>2</sub> |             |             |             |
| C                               | 5.00069600  | 1.21294300  | -2.06976200 |
| C                               | 5.33105400  | -1.57848300 | -1.82479000 |
| C                               | 6.18108900  | -0.71365300 | -1.07849900 |
| C                               | 6.01271900  | 0.71027900  | -1.20463100 |
| C                               | 4.36831900  | 2.40201900  | -1.43769400 |
| C                               | 2.97749100  | 2.23019200  | -1.52080600 |
| C                               | 2.19801400  | 2.24178400  | -0.35330500 |
| C                               | 4.97846100  | 2.58385400  | -0.18740100 |
| C                               | 4.20027500  | 2.59640300  | 0.97984200  |
| C                               | 2.80997100  | 2.42452300  | 0.89678700  |
| C                               | 6.01125600  | -0.51643500 | 1.37544300  |
| C                               | 5.84303800  | 0.90747800  | 1.24889400  |
| C                               | 5.99741400  | 1.51017400  | -0.02972700 |
| C                               | 6.32938700  | -1.27939800 | 0.21691700  |
| C                               | 1.61400900  | 0.38524100  | 0.99539700  |
| C                               | 1.46113500  | 0.95222500  | -0.30089200 |
| C                               | 1.78065900  | -1.03821800 | 1.12218600  |
| C                               | 2.45873200  | 1.25029500  | 1.73940500  |
| C                               | 1.77941700  | 0.18862800  | -1.45695300 |
| C                               | 2.73148300  | 0.93373000  | -2.20610100 |
| C                               | 1.94732300  | -1.23580600 | -1.33010600 |
| C                               | 1.78579800  | -1.84107800 | -0.05247400 |
| C                               | 3.05897600  | -1.85934600 | -1.96014900 |
| C                               | 4.14900400  | -1.07357300 | -2.43110800 |
| C                               | 3.98111800  | 0.35106800  | -2.55818700 |
| C                               | 2.80649000  | -2.91027300 | 0.10413100  |
| C                               | 3.58517300  | -2.92185100 | -1.06383100 |

|                                 |             |             |             |
|---------------------------------|-------------|-------------|-------------|
| C                               | 4.97626200  | -2.75019000 | -0.98097700 |
| C                               | 3.41876900  | -2.72819300 | 1.35451600  |
| C                               | 3.64134800  | 0.74572600  | 2.35078000  |
| C                               | 3.80926500  | -0.67857000 | 2.47710900  |
| C                               | 2.78750900  | -1.54101300 | 1.98952900  |
| C                               | 4.72668200  | 1.52958500  | 1.87442800  |
| C                               | 5.05773700  | -1.26068000 | 2.12362700  |
| C                               | 4.80936600  | -2.55664800 | 1.43670200  |
| C                               | 5.58806100  | -2.56775100 | 0.26888600  |
| C                               | -3.05206900 | 1.84178600  | -1.88962800 |
| C                               | -2.74146200 | -0.95475600 | -2.11772400 |
| C                               | -1.78381300 | -0.21021200 | -1.37482300 |
| C                               | -1.94324200 | 1.21596600  | -1.25715900 |
| C                               | -3.57075300 | 2.91322700  | -0.99951800 |
| C                               | -4.96270400 | 2.75026300  | -0.91352800 |
| C                               | -5.57368800 | 2.57944700  | 0.33837200  |
| C                               | -2.79040400 | 2.90477000  | 0.16736500  |
| C                               | -3.40181000 | 2.73448000  | 1.41979900  |
| C                               | -4.79324500 | 2.57153000  | 1.50505500  |
| C                               | -1.61519800 | -0.39160400 | 1.07866700  |
| C                               | -1.77314400 | 1.03365600  | 1.19629900  |
| C                               | -1.77623900 | 1.82857200  | 0.01633200  |
| C                               | -1.46846300 | -0.96789000 | -0.21439600 |
| C                               | -6.00681700 | 0.53805800  | 1.45925500  |
| C                               | -6.32256900 | 1.29520600  | 0.29601300  |
| C                               | -5.84706400 | -0.88764800 | 1.34194000  |
| C                               | -5.04811400 | 1.28166700  | 2.20094500  |
| C                               | -6.17932100 | 0.72014300  | -0.99568600 |
| C                               | -5.32556600 | 1.57517500  | -1.74924400 |
| C                               | -6.01943500 | -0.70561400 | -1.11262600 |
| C                               | -6.00707900 | -1.49788300 | 0.06766600  |
| C                               | -5.01204300 | -1.21992500 | -1.97603000 |
| C                               | -3.98799200 | -0.36714500 | -2.47163900 |
| C                               | -4.14741700 | 1.05927500  | -2.35372700 |
| C                               | -4.99473200 | -2.57843500 | -0.08454100 |
| C                               | -4.38560400 | -2.40838500 | -1.33705300 |
| C                               | -2.99398200 | -2.24520100 | -1.42349900 |
| C                               | -4.21465800 | -2.58778900 | 1.08150000  |
| C                               | -3.80218200 | 0.69469100  | 2.55640300  |
| C                               | -3.64272500 | -0.73133500 | 2.43929400  |
| C                               | -4.73331800 | -1.51204600 | 1.96991500  |
| C                               | -2.77641600 | 1.54785300  | 2.06165700  |
| C                               | -2.46402900 | -1.24675800 | 1.82937100  |
| C                               | -2.82351600 | -2.42458400 | 0.99498200  |
| C                               | -2.21268500 | -2.25354000 | -0.25719800 |
| (C <sub>60</sub> ) <sub>2</sub> |             |             |             |
| C                               | 6.85540300  | 3.15974500  | -0.02038100 |
| C                               | 5.70588900  | 3.54806800  | -0.81377400 |
| C                               | 4.46213100  | 3.67615400  | -0.21574500 |
| C                               | 4.31036700  | 3.42086000  | 1.20318800  |
| C                               | 5.40941000  | 3.04954500  | 1.96181700  |
| C                               | 6.71042800  | 2.91597400  | 1.33625300  |
| C                               | 7.68412300  | 2.28801300  | -0.82934800 |
| C                               | 7.04715500  | 2.13701300  | -2.12269300 |
| C                               | 5.82469700  | 2.91631300  | -2.11300900 |
| C                               | 4.69401900  | 2.43975700  | -2.75733400 |
| C                               | 3.27962100  | 3.17783500  | -0.89000500 |
| C                               | 3.03399300  | 2.76470400  | 1.40632100  |
| C                               | 2.91247300  | 1.76600700  | 2.35969200  |
| C                               | 4.06164200  | 1.37744100  | 3.15313700  |

|   |             |             |             |
|---|-------------|-------------|-------------|
| C | 5.28215800  | 2.00484200  | 2.95864500  |
| C | 6.50436600  | 1.22543000  | 2.94920100  |
| C | 7.38705500  | 1.78855300  | 1.94651900  |
| C | 8.17917600  | 0.95506600  | 1.17295600  |
| C | 8.33138600  | 1.21031500  | -0.24568300 |
| C | 7.08527000  | 0.91544400  | -2.77607400 |
| C | 7.76223900  | -0.21160000 | -2.16569600 |
| C | 8.37124800  | -0.06750300 | -0.92898600 |
| C | 8.24381800  | -1.11243200 | 0.06761700  |
| C | 8.12508400  | -0.48049400 | 1.36659800  |
| C | 7.28069800  | -1.01904900 | 2.32463800  |
| C | 6.45222000  | -0.14725900 | 3.13386400  |
| C | 5.17600800  | -0.80358600 | 3.33683800  |
| C | 4.00738400  | -0.05849400 | 3.34679700  |
| C | 2.39700900  | 2.61460200  | 0.11226700  |
| C | 2.22734900  | -1.93041500 | 0.72608800  |
| C | 1.58627400  | -0.85084900 | 0.14169100  |
| C | 1.73411400  | -0.59606600 | -1.27691800 |
| C | 2.52329000  | -1.43047700 | -2.05109200 |
| C | 3.19979500  | -2.55824000 | -1.44023400 |
| C | 4.20426400  | -3.19062600 | 0.70990400  |
| C | 4.08530100  | -2.55859900 | 2.00942300  |
| C | 2.86287900  | -1.77941800 | 2.01960600  |
| C | 2.82473400  | -0.55747500 | 2.67319600  |
| C | 2.14919400  | 0.56980200  | 2.06275800  |
| C | 1.54634100  | 0.42565700  | 0.82429100  |
| C | 1.78583000  | 0.83910300  | -1.47105800 |
| C | 2.62904400  | 1.37789000  | -2.42962000 |
| C | 3.45754800  | 0.50575200  | -3.23883200 |
| C | 3.40570300  | -0.86715900 | -3.05385900 |
| C | 4.62799100  | -1.64634800 | -3.06255800 |
| C | 4.50062300  | -2.69134700 | -2.06560100 |
| C | 5.59967800  | -3.06262900 | -1.30696300 |
| C | 5.44807000  | -3.31797900 | 0.11165400  |
| C | 5.21587100  | -2.08138400 | 2.65329500  |
| C | 6.51667400  | -2.21464900 | 2.02771100  |
| C | 6.63049300  | -2.81892000 | 0.78567000  |
| C | 7.51339400  | -2.25561200 | -0.21637100 |
| C | 6.87623000  | -2.40604900 | -1.50980100 |
| C | 6.99794000  | -1.40706600 | -2.46263400 |
| C | 5.84843700  | -1.01873700 | -3.25632500 |
| C | 5.90257800  | 0.41680200  | -3.45006200 |
| C | 4.73387000  | 1.16189500  | -3.44092000 |
| C | 1.66973800  | 1.47052800  | -0.17206100 |
| C | 3.39310100  | 2.57366600  | -2.13240400 |
| C | 3.05509500  | -2.80259600 | -0.08352500 |
| C | -3.05449200 | 2.80221400  | 0.08386800  |
| C | -4.20362800 | 3.19058200  | -0.70944700 |
| C | -5.44738400 | 3.31809200  | -0.11112000 |
| C | -5.59897300 | 3.06256600  | 1.30746700  |
| C | -4.49995500 | 2.69095900  | 2.06600100  |
| C | -3.19917100 | 2.55768700  | 1.44054900  |
| C | -2.22696200 | 1.92997800  | -0.72591200 |
| C | -2.86258900 | 1.77929800  | -2.01941500 |
| C | -4.08485400 | 2.55872800  | -2.00906400 |
| C | -5.21555400 | 2.08183300  | -2.65294100 |
| C | -6.62994100 | 2.81936800  | -0.78514400 |
| C | -6.87564400 | 2.40620100  | 1.51027000  |
| C | -6.99750800 | 1.40711000  | 2.46296700  |
| C | -5.84803500 | 1.01843300  | 3.25654800  |

|                                 |             |             |             |
|---------------------------------|-------------|-------------|-------------|
| C                               | -4.62747900 | 1.64583500  | 3.06281000  |
| C                               | -3.40534300 | 0.86640900  | 3.05393600  |
| C                               | -2.52286100 | 1.42970200  | 2.05121800  |
| C                               | -1.73389500 | 0.59524400  | 1.27688700  |
| C                               | -1.58609200 | 0.85020000  | -0.14169500 |
| C                               | -2.82472000 | 0.55744600  | -2.67318800 |
| C                               | -2.14937500 | -0.57004800 | -2.06295300 |
| C                               | -1.54641500 | -0.42620600 | -0.82450300 |
| C                               | -1.66995100 | -1.47119300 | 0.17172000  |
| C                               | -1.78586900 | -0.83994100 | 1.47082900  |
| C                               | -2.62916400 | -1.37869800 | 2.42934100  |
| C                               | -3.45745600 | -0.50651900 | 3.23872000  |
| C                               | -4.73389800 | -1.16243600 | 3.44076300  |
| C                               | -5.90245700 | -0.41711800 | 3.45007300  |
| C                               | -7.51290100 | 2.25607900  | 0.21685000  |
| C                               | -7.68451400 | -2.28759000 | 0.82916500  |
| C                               | -8.33159300 | -1.20967900 | 0.24568600  |
| C                               | -8.17939900 | -0.95425000 | -1.17292600 |
| C                               | -7.38747600 | -1.78778100 | -1.94664400 |
| C                               | -6.71105000 | -2.91542500 | -1.33657300 |
| C                               | -5.70652200 | -3.54802500 | 0.81331800  |
| C                               | -5.82514200 | -2.91643800 | 2.11264900  |
| C                               | -7.04744800 | -2.13689900 | 2.12249900  |
| C                               | -7.08528400 | -0.91542100 | 2.77606200  |
| C                               | -7.76205800 | 0.21184100  | 2.16588700  |
| C                               | -8.37116100 | 0.06804200  | 0.92918600  |
| C                               | -8.12502800 | 0.48132500  | -1.36635700 |
| C                               | -7.28058100 | 1.01986300  | -2.32435500 |
| C                               | -6.45231600 | 0.14803000  | -3.13375000 |
| C                               | -6.50473000 | -1.22467800 | -2.94927800 |
| C                               | -5.28267500 | -2.00432800 | -2.95890000 |
| C                               | -5.41007800 | -3.04915700 | -1.96221700 |
| C                               | -4.31107500 | -3.42079200 | -1.20369000 |
| C                               | -4.46281600 | -3.67625900 | 0.21521400  |
| C                               | -4.69433600 | -2.44020000 | 2.75698300  |
| C                               | -3.39347400 | -2.57427100 | 2.13197700  |
| C                               | -3.28017600 | -3.17827000 | 0.88948400  |
| C                               | -2.39750800 | -2.61505900 | -0.11273600 |
| C                               | -3.03458500 | -2.76485000 | -1.40678300 |
| C                               | -2.91291000 | -1.76605400 | -2.36003100 |
| C                               | -4.06205000 | -1.37713800 | -3.15336400 |
| C                               | -4.00750900 | 0.05880800  | -3.34680900 |
| C                               | -5.17598300 | 0.80413100  | -3.33668100 |
| C                               | -8.24357000 | 1.11309000  | -0.06727300 |
| C                               | -6.51630300 | 2.21526500  | -2.02728100 |
| C                               | -6.85600200 | -3.15936800 | 0.02003300  |
| (C <sub>70</sub> ) <sub>2</sub> |             |             |             |
| C                               | -4.67977100 | 3.96617700  | 1.17076400  |
| C                               | -4.31714300 | 3.21790400  | 2.28242400  |
| C                               | -5.30572900 | 2.43895500  | 2.98978800  |
| C                               | -6.61538300 | 2.43855700  | 2.56615900  |
| C                               | -7.00245400 | 3.21733000  | 1.41405100  |
| C                               | -6.05758500 | 3.96572500  | 0.72531700  |
| C                               | -7.98314300 | -2.43694300 | -0.68334300 |
| C                               | -7.00704800 | -3.21567000 | -1.40774000 |
| C                               | -6.05996700 | -3.96405000 | -0.72206200 |
| C                               | -6.62367200 | -2.43689500 | -2.56109800 |
| C                               | -5.31539300 | -2.43727200 | -2.98897500 |
| C                               | -4.32450900 | -3.21620900 | -2.28482000 |
| C                               | -4.68359400 | -3.96451800 | -1.17205600 |

|   |             |             |             |
|---|-------------|-------------|-------------|
| C | -3.10928400 | -2.43707600 | -2.27706400 |
| C | -2.29896500 | -2.43688500 | -1.16392300 |
| C | -2.66166500 | -3.21635300 | -0.00373500 |
| C | -2.29526000 | -2.43675900 | 1.15519900  |
| C | -3.10197700 | -2.43684200 | 2.27096700  |
| C | -7.37292100 | 1.20061000  | 2.56384100  |
| C | -6.82880900 | 0.00098700  | 3.07663700  |
| C | -5.43187800 | 0.00101100  | 3.52824800  |
| C | -4.69066900 | 1.20083200  | 3.43118000  |
| C | -3.33856600 | -1.19894400 | 2.99038800  |
| C | -3.33856700 | 1.20091000  | 2.99026300  |
| C | -2.68355400 | 0.00096400  | 2.63047100  |
| C | -1.82661000 | 0.00090300  | 1.44018900  |
| C | -1.69128500 | 1.19967300  | 0.70516400  |
| C | -1.69348700 | 1.19961200  | -0.71624600 |
| C | -7.98089800 | 2.43861100  | 0.69281500  |
| C | -7.98314300 | 2.43853000  | -0.68359400 |
| C | -7.00704900 | 3.21718300  | -1.40807100 |
| C | -6.05996800 | 3.96563400  | -0.72247000 |
| C | -6.62367200 | 2.43829000  | -2.56134800 |
| C | -5.31539300 | 2.43862400  | -2.98922600 |
| C | -4.32450900 | 3.21763400  | -2.28515200 |
| C | -4.68359500 | 3.96605800  | -1.17246500 |
| C | -3.10928400 | 2.43850200  | -2.27731600 |
| C | -2.29896500 | 2.43842400  | -1.16417500 |
| C | -2.66166500 | 3.21801200  | -0.00406700 |
| C | -3.83037100 | 3.96675100  | -0.00222600 |
| C | -2.29526000 | 2.43853600  | 1.15494800  |
| C | -3.10197600 | 2.43873400  | 2.27071600  |
| C | -4.67977100 | -3.96439700 | 1.17117200  |
| C | -4.31714300 | -3.21601100 | 2.28275600  |
| C | -5.30572900 | -2.43698900 | 2.99004000  |
| C | -6.61538300 | -2.43663400 | 2.56641100  |
| C | -7.00245400 | -3.21552600 | 1.41438200  |
| C | -6.05758500 | -3.96399200 | 0.72572500  |
| C | -7.98089800 | -2.43688100 | 0.69306600  |
| C | -1.83110600 | 0.00075400  | -1.45072900 |
| C | -2.69199600 | 0.00069400  | -2.63821500 |
| C | -3.34821800 | 1.20059400  | -2.99596500 |
| C | -4.70177300 | 1.20046900  | -3.43246700 |
| C | -5.44329600 | 0.00064700  | -3.52698800 |
| C | -6.83874900 | 0.00067100  | -3.07087600 |
| C | -7.38120000 | 1.20034700  | -2.55644600 |
| C | -8.21511100 | -1.19878700 | -1.40426300 |
| C | -8.53445400 | 0.00079100  | -0.72842600 |
| C | -8.53207800 | 0.00086700  | 0.73966900  |
| C | -8.21054000 | -1.19864400 | 1.41459900  |
| C | -7.37292100 | -1.19868800 | 2.56396500  |
| C | -4.69067000 | -1.19882000 | 3.43130400  |
| C | -1.69128400 | -1.19794300 | 0.70529000  |
| C | -1.69348500 | -1.19802900 | -0.71612300 |
| C | -3.34821700 | -1.19924300 | -2.99584100 |
| C | -4.70177300 | -1.19916500 | -3.43234400 |
| C | -7.38120100 | -1.19895300 | -2.55632400 |
| C | -8.21511000 | 1.20030000  | -1.40438700 |
| C | -8.21054200 | 1.20044800  | 1.41447600  |
| C | -3.83037100 | -3.96509300 | -0.00181800 |
| C | 4.67977100  | -3.96617700 | 1.17076400  |
| C | 4.31714300  | -3.21790400 | 2.28242400  |
| C | 5.30572900  | -2.43895500 | 2.98978800  |



|   |            |             |             |
|---|------------|-------------|-------------|
| C | 6.61538300 | -2.43855700 | 2.56615900  |
| C | 7.00245400 | -3.21733000 | 1.41405100  |
| C | 6.05758500 | -3.96572500 | 0.72531700  |
| C | 7.98314300 | 2.43694300  | -0.68334300 |
| C | 7.00704800 | 3.21567000  | -1.40774000 |
| C | 6.05996700 | 3.96405000  | -0.72206200 |
| C | 6.62367200 | 2.43689500  | -2.56109800 |
| C | 5.31539300 | 2.43727200  | -2.98897500 |
| C | 4.32450900 | 3.21620900  | -2.28482000 |
| C | 4.68359400 | 3.96451800  | -1.17205600 |
| C | 3.10928400 | 2.43707600  | -2.27706400 |
| C | 2.29896500 | 2.43688500  | -1.16392300 |
| C | 2.66166500 | 3.21635300  | -0.00373500 |
| C | 2.29526000 | 2.43675900  | 1.15519900  |
| C | 3.10197700 | 2.43684200  | 2.27096700  |
| C | 7.37292100 | -1.20061000 | 2.56384100  |
| C | 6.82880900 | -0.00098700 | 3.07663700  |
| C | 5.43187800 | -0.00101100 | 3.52824800  |
| C | 4.69066900 | -1.20083200 | 3.43118000  |
| C | 3.33856600 | 1.19894400  | 2.99038800  |
| C | 3.33856700 | -1.20091000 | 2.99026300  |
| C | 2.68355400 | -0.00096400 | 2.63047100  |
| C | 1.82661000 | -0.00090300 | 1.44018900  |
| C | 1.69128500 | -1.19967300 | 0.70516400  |
| C | 1.69348700 | -1.19961200 | -0.71624600 |
| C | 7.98089800 | -2.43861100 | 0.69281500  |
| C | 7.98314300 | -2.43853000 | -0.68359400 |
| C | 7.00704900 | -3.21718300 | -1.40807100 |
| C | 6.05996800 | -3.96563400 | -0.72247000 |
| C | 6.62367200 | -2.43829000 | -2.56134800 |
| C | 5.31539300 | -2.43862400 | -2.98922600 |
| C | 4.32450900 | -3.21763400 | -2.28515200 |
| C | 4.68359500 | -3.96605800 | -1.17246500 |
| C | 3.10928400 | -2.43850200 | -2.27731600 |
| C | 2.29896500 | -2.43842400 | -1.16417500 |
| C | 2.66166500 | -3.21801200 | -0.00406700 |
| C | 3.83037100 | -3.96675100 | -0.00222600 |
| C | 2.29526000 | -2.43853600 | 1.15494800  |
| C | 3.10197600 | -2.43873400 | 2.27071600  |
| C | 4.67977100 | 3.96439700  | 1.17117200  |
| C | 4.31714300 | 3.21601100  | 2.28275600  |
| C | 5.30572900 | 2.43698900  | 2.99004000  |
| C | 6.61538300 | 2.43663400  | 2.56641100  |
| C | 7.00245400 | 3.21552600  | 1.41438200  |
| C | 6.05758500 | 3.96399200  | 0.72572500  |
| C | 7.98089800 | 2.43688100  | 0.69306600  |
| C | 1.83110600 | -0.00075400 | -1.45072900 |
| C | 2.69199600 | -0.00069400 | -2.63821500 |
| C | 3.34821800 | -1.20059400 | -2.99596500 |
| C | 4.70177300 | -1.20046900 | -3.43246700 |
| C | 5.44329600 | -0.00064700 | -3.52698800 |
| C | 6.83874900 | -0.00067100 | -3.07087600 |
| C | 7.38120000 | -1.20034700 | -2.55644600 |
| C | 8.21511100 | 1.19878700  | -1.40426300 |
| C | 8.53445400 | -0.00079100 | -0.72842600 |
| C | 8.53207800 | -0.00086700 | 0.73966900  |
| C | 8.21054000 | 1.19864400  | 1.41459900  |
| C | 7.37292100 | 1.19868800  | 2.56396500  |
| C | 4.69067000 | 1.19882000  | 3.43130400  |
| C | 1.69128400 | 1.19794300  | 0.70529000  |

|                                 |             |             |             |
|---------------------------------|-------------|-------------|-------------|
| C                               | 1.69348500  | 1.19802900  | -0.71612300 |
| C                               | 3.34821700  | 1.19924300  | -2.99584100 |
| C                               | 4.70177300  | 1.19916500  | -3.43234400 |
| C                               | 7.38120100  | 1.19895300  | -2.55632400 |
| C                               | 8.21511000  | -1.20030000 | -1.40438700 |
| C                               | 8.21054200  | -1.20044800 | 1.41447600  |
| C                               | 3.83037100  | 3.96509300  | -0.00181800 |
| (C <sub>84</sub> ) <sub>2</sub> |             |             |             |
| C                               | 1.22457700  | -4.10736300 | 0.38933300  |
| C                               | 0.02892900  | -4.10096200 | 1.14518400  |
| C                               | -1.16665500 | -4.10890400 | 0.38905800  |
| C                               | 1.22453200  | -3.99751000 | -1.02089800 |
| C                               | 0.02884900  | -3.87417700 | -1.76670800 |
| C                               | -1.16668700 | -3.99908500 | -1.02073400 |
| C                               | 0.02822700  | -3.46701700 | 2.47171000  |
| C                               | -1.16795700 | -2.88401300 | 2.95184700  |
| C                               | 2.40465900  | -3.41133100 | 0.87901300  |
| C                               | 2.40406500  | -2.82567900 | 2.10450200  |
| C                               | 1.22316700  | -2.88228100 | 2.95254100  |
| C                               | 2.40391300  | -2.46565300 | -2.51684500 |
| C                               | 2.40469100  | -3.23408200 | -1.39687400 |
| C                               | 3.06617400  | -2.76387300 | -0.21541500 |
| C                               | -1.16811900 | -2.39210000 | -3.36290800 |
| C                               | 0.02807900  | -3.04236500 | -2.97888900 |
| C                               | 1.22299300  | -2.39027300 | -3.36345700 |
| C                               | 2.40206900  | -0.94336400 | 3.39596000  |
| C                               | 1.22193100  | -1.71595100 | 3.75283500  |
| C                               | 0.02573300  | -1.05859500 | 4.12423500  |
| C                               | -1.16913800 | -1.71805000 | 3.75189200  |
| C                               | 2.40071000  | 0.41078400  | 3.50144700  |
| C                               | 2.39868000  | 2.47041200  | 2.51707200  |
| C                               | 3.06200400  | 1.19982300  | 2.50415400  |
| C                               | 2.39804100  | 3.23884700  | 1.39710900  |
| C                               | 3.06471000  | -1.19373600 | -2.50387200 |
| C                               | 3.56556200  | -0.62469400 | -1.31432400 |
| C                               | 3.56642800  | -1.44904600 | -0.11299800 |
| C                               | 3.56565500  | -0.82074000 | 1.20153000  |
| C                               | 3.06492900  | -1.56710200 | 2.28868500  |
| C                               | 3.56414000  | 0.82784300  | -1.20118000 |
| C                               | 3.56351200  | 1.45615500  | 0.11335000  |
| C                               | 3.56418100  | 0.63179700  | 1.31467800  |
| C                               | 3.06062400  | 2.76999300  | 0.21572000  |
| C                               | 1.21912100  | 1.11641100  | 3.97351100  |
| C                               | 0.02424800  | 0.40710500  | 4.23838100  |
| C                               | -1.17204700 | 1.11385100  | 3.97253000  |
| C                               | -2.35228300 | 0.40604900  | 3.49991100  |
| C                               | -2.35090600 | -0.94795500 | 3.39443600  |
| C                               | 0.02167300  | 3.04236600  | 2.97888900  |
| C                               | -1.17326500 | 2.38970100  | 3.36278300  |
| C                               | 1.21784000  | 2.39266600  | 3.36357600  |
| C                               | -2.34829100 | -3.41489200 | 0.87827700  |
| C                               | -2.34898900 | -2.82930300 | 2.10363300  |
| C                               | -3.01408300 | -1.57311400 | 2.28825900  |
| C                               | -3.01678600 | 1.19366800  | 2.50374000  |
| C                               | -3.52605400 | 1.45037100  | 0.11309400  |
| C                               | -3.52526600 | 0.62526700  | 1.31555200  |
| C                               | -3.52382200 | -0.82861800 | 1.20229700  |
| C                               | -3.01700100 | 1.56701300  | -2.28857500 |
| C                               | -3.52535600 | 0.82149600  | -1.20266200 |
| C                               | -3.52386900 | -0.63239300 | -1.31591600 |

|   |             |             |             |
|---|-------------|-------------|-------------|
| C | -3.52312300 | -1.45749500 | -0.11346000 |
| C | -3.01272900 | -2.76985700 | -0.21571500 |
| C | -2.35508200 | 3.23296400  | 1.39619500  |
| C | -2.35429500 | 2.46461700  | 2.51604000  |
| C | -3.01830500 | 2.76375500  | 0.21540000  |
| C | 1.21640000  | 3.99991200  | 1.02101400  |
| C | 0.02089600  | 3.87417300  | 1.76670500  |
| C | -1.17481300 | 3.99667900  | 1.02060700  |
| C | -2.34844300 | -3.23773200 | -1.39644200 |
| C | -2.34908400 | -2.46938400 | -2.51628600 |
| C | -3.01412200 | -1.19977300 | -2.50405000 |
| C | -1.17220300 | 1.71564800  | -3.75201900 |
| C | -2.35245800 | 0.94318300  | -3.39468300 |
| C | -2.35110200 | -0.41081800 | -3.50015500 |
| C | 1.21886500  | 1.71834200  | -3.75272400 |
| C | 0.02402500  | 1.05858900  | -4.12424300 |
| C | -2.35505000 | 3.41012000  | -0.87852400 |
| C | 1.21767700  | 2.88467300  | -2.95242900 |
| C | 0.02152400  | 3.46701500  | -2.47172100 |
| C | -1.17344000 | 2.88161200  | -2.95197600 |
| C | -2.35445000 | 2.82453000  | -2.10388100 |
| C | 2.39858600  | 2.83043800  | -2.10426100 |
| C | 2.39789000  | 3.41609600  | -0.87877500 |
| C | 1.21636700  | 4.10976300  | -0.38921900 |
| C | 0.02081500  | 4.10095700  | -1.14519300 |
| C | -1.17485800 | 4.10649600  | -0.38918500 |
| C | 2.40189600  | -0.40602700 | -3.50121200 |
| C | 2.40051500  | 0.94812500  | -3.39573300 |
| C | 3.06198100  | 1.57318700  | -2.28837200 |
| C | -1.16939500 | -1.11625000 | -3.97265700 |
| C | 0.02550900  | -0.40711000 | -4.23838500 |
| C | 1.22177700  | -1.11402100 | -3.97339400 |
| C | 11.66667900 | -4.10889100 | 0.38907200  |
| C | 10.47109400 | -4.10095600 | 1.14519600  |
| C | 9.27544800  | -4.10736500 | 0.38934300  |
| C | 11.66671300 | -3.99907400 | -1.02072000 |
| C | 10.47117800 | -3.87417400 | -1.76669600 |
| C | 9.27549400  | -3.99751400 | -1.02088800 |
| C | 10.47179100 | -3.46700900 | 2.47172100  |
| C | 9.27684600  | -2.88227900 | 2.95255000  |
| C | 12.84831000 | -3.41487200 | 0.87829200  |
| C | 12.84900300 | -2.82928000 | 2.10364800  |
| C | 11.66796900 | -2.88399800 | 2.95185900  |
| C | 12.84910400 | -2.46936900 | -2.51627200 |
| C | 12.84846500 | -3.23771500 | -1.39642800 |
| C | 13.51274600 | -2.76983400 | -0.21569900 |
| C | 9.27702800  | -2.39028000 | -3.36344900 |
| C | 10.47194500 | -3.04236500 | -2.97887900 |
| C | 11.66814000 | -2.39209300 | -3.36289700 |
| C | 12.85090500 | -0.94793100 | 3.39444800  |
| C | 11.66914200 | -1.71803200 | 3.75190200  |
| C | 10.47426600 | -1.05858400 | 4.12424300  |
| C | 9.27807200  | -1.71594900 | 3.75284100  |
| C | 12.85227300 | 0.40607300  | 3.49992100  |
| C | 12.85427600 | 2.46464100  | 2.51604800  |
| C | 13.51677400 | 1.19369600  | 2.50375100  |
| C | 12.85505800 | 3.23298400  | 1.39620100  |
| C | 13.51413400 | -1.19975300 | -2.50403700 |
| C | 14.02387500 | -0.63236700 | -1.31590200 |
| C | 14.02313100 | -1.45746800 | -0.11344500 |

|   |             |             |             |
|---|-------------|-------------|-------------|
| C | 14.02382500 | -0.82859000 | 1.20231200  |
| C | 13.51408900 | -1.57308800 | 2.28827400  |
| C | 14.02535500 | 0.82152100  | -1.20265100 |
| C | 14.02604600 | 1.45039800  | 0.11310600  |
| C | 14.02526200 | 0.62529600  | 1.31556400  |
| C | 13.51828800 | 2.76378000  | 0.21540900  |
| C | 11.67203300 | 1.11386700  | 3.97253700  |
| C | 10.47574200 | 0.40711500  | 4.23838700  |
| C | 9.28086500  | 1.11641500  | 3.97351400  |
| C | 8.09928100  | 0.41077900  | 3.50144800  |
| C | 8.09793000  | -0.94336900 | 3.39596300  |
| C | 10.47830400 | 3.04237500  | 2.97889100  |
| C | 9.28213900  | 2.39266700  | 3.36357700  |
| C | 11.67324400 | 2.38971800  | 3.36278800  |
| C | 8.09536100  | -3.41134000 | 0.87901900  |
| C | 8.09594900  | -2.82568600 | 2.10450800  |
| C | 7.43507700  | -1.56711300 | 2.28868800  |
| C | 7.43798400  | 1.19981100  | 2.50415200  |
| C | 6.93647900  | 1.45613800  | 0.11334700  |
| C | 6.93581300  | 0.63178100  | 1.31467600  |
| C | 6.93434800  | -0.82075600 | 1.20153000  |
| C | 7.43801400  | 1.57317000  | -2.28837300 |
| C | 6.93585800  | 0.82782500  | -1.20118100 |
| C | 6.93444400  | -0.62471400 | -1.31432300 |
| C | 6.93358100  | -1.44906300 | -0.11299700 |
| C | 7.43384300  | -2.76388800 | -0.21541100 |
| C | 8.10193500  | 3.23883900  | 1.39710700  |
| C | 8.10130200  | 2.47040500  | 2.51706900  |
| C | 7.43935800  | 2.76998000  | 0.21571600  |
| C | 11.67478500 | 3.99669200  | 1.02061000  |
| C | 10.47907700 | 3.87418000  | 1.76670600  |
| C | 9.28357200  | 3.99991000  | 1.02101200  |
| C | 8.09533100  | -3.23409400 | -1.39686700 |
| C | 8.09610700  | -2.46566600 | -2.51684000 |
| C | 7.43530200  | -1.19375400 | -2.50386900 |
| C | 9.28113200  | 1.71833500  | -3.75272200 |
| C | 8.09948600  | 0.94811000  | -3.39573300 |
| C | 8.09811300  | -0.40604100 | -3.50121100 |
| C | 11.67219900 | 1.71565500  | -3.75201300 |
| C | 10.47597700 | 1.05858800  | -4.12423800 |
| C | 8.10209000  | 3.41608400  | -0.87877800 |
| C | 11.67342700 | 2.88162100  | -2.95197200 |
| C | 10.47845900 | 3.46701700  | -2.47171900 |
| C | 9.28231100  | 2.88466600  | -2.95242900 |
| C | 8.10140000  | 2.83042500  | -2.10426300 |
| C | 12.85443600 | 2.82454800  | -2.10387400 |
| C | 12.85503000 | 3.41013800  | -0.87851800 |
| C | 11.67483300 | 4.10650800  | -0.38918300 |
| C | 10.47916200 | 4.10096000  | -1.14519200 |
| C | 9.28360800  | 4.10976000  | -0.38921900 |
| C | 12.85111100 | -0.41080400 | -3.50014300 |
| C | 12.85246000 | 0.94319800  | -3.39467400 |
| C | 13.51699600 | 1.56703400  | -2.28856600 |
| C | 9.27823800  | -1.11402900 | -3.97338800 |
| C | 10.47450100 | -0.40711100 | -4.23837800 |
| C | 11.66941000 | -1.11624400 | -3.97264700 |

## References

- [1] L.A. Girifalco, Molecular properties of fullerene in the gas and solid phases, *J. Phys. Chem.* 96 (1992) 858–861. <https://doi.org/10.1021/j100181a061>.
- [2] F.-L. Liu, J. Wang, The intermolecular potential function of Smith–Thakkar type for C60, *J. Mol. Struct. THEOCHEM.* 778 (2006) 105–109.  
<https://doi.org/https://doi.org/10.1016/j.theochem.2006.06.012>.
- [3] T.-C. Lim, Preliminary assessment of a multifunctional potential energy function, *Mol. Phys.* 108 (2010) 1589–1597. <https://doi.org/10.1080/00268976.2010.484817>.
